# Supplementary material
Source: Research Square preprint supplement (doi:10.21203/rs.3.rs-9237170/v1)
Supplement: Supplementary file 1 [file 9506c7912f09e1a7aa168ef8.pdf]

# Supplementary Materials for Spatio-temporal Bayesian Quantile Regression for High Air-Pollution Concentrations

Edoardo Rosci<sup>1,2\*</sup>, Jorge Castillo-Mateo<sup>3</sup>, Massimo Stafoggia<sup>2</sup>,  
Paola Michelozzi<sup>2</sup>, Giovanna Jona Lasinio<sup>1</sup>

<sup>1\*</sup>Department of Statistical Sciences, Sapienza University of Rome,  
Piazzale Aldo Moro 5, Rome, 00185, Italy.

<sup>2</sup>Department of Epidemiology, Lazio Region Health Service/ASL Roma  
1, Via Cristoforo Colombo 112, Rome RM, 00147, Italy.

<sup>3</sup>Department of Statistical Methods, University of Zaragoza, Pedro  
Cerbuna 12, Zaragoza, 50009, Spain.

\*Corresponding author(s). E-mail(s): [edoardo.roschi@uniroma1.it](mailto:edoardo.roschi@uniroma1.it),  
[e.roschi@deplazio.it](mailto:e.roschi@deplazio.it);

**Keywords:** Air pollution, Bayesian modelling, Exposure assessment, Markov chain  
Monte Carlo, Quantile regression

## 1 Additional exploratory descriptive analysis

### 1.1 Temporal patterns

First kind of temporal structure we would like to introduce in the models is the working day and WE/holidays. As shown in Figure 1, such seasonality is especially underlined for NO<sub>2</sub>, whilst particulate matter display it only very limited (PM<sub>10</sub> and PM<sub>2.5</sub>). Figure 2 reports within-year seasonality. All pollutants show higher concentrations during winter and working months, while lower values are usually detected in summer.

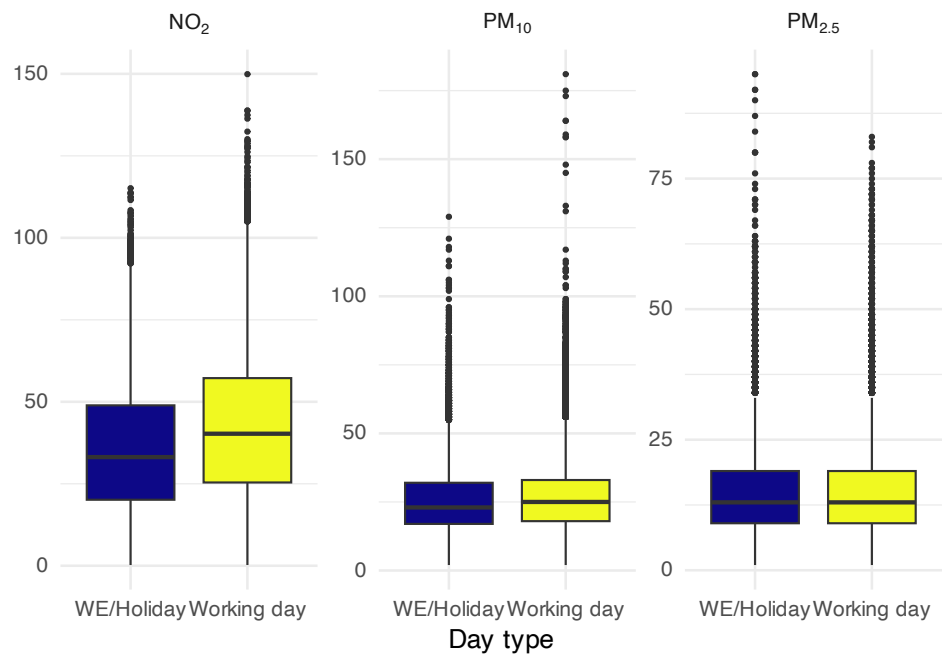

**Fig. 1** Boxplots for working days and WE/holidays. Values in  $\mu\text{g}/\text{m}^3$ ; 2011–2022.

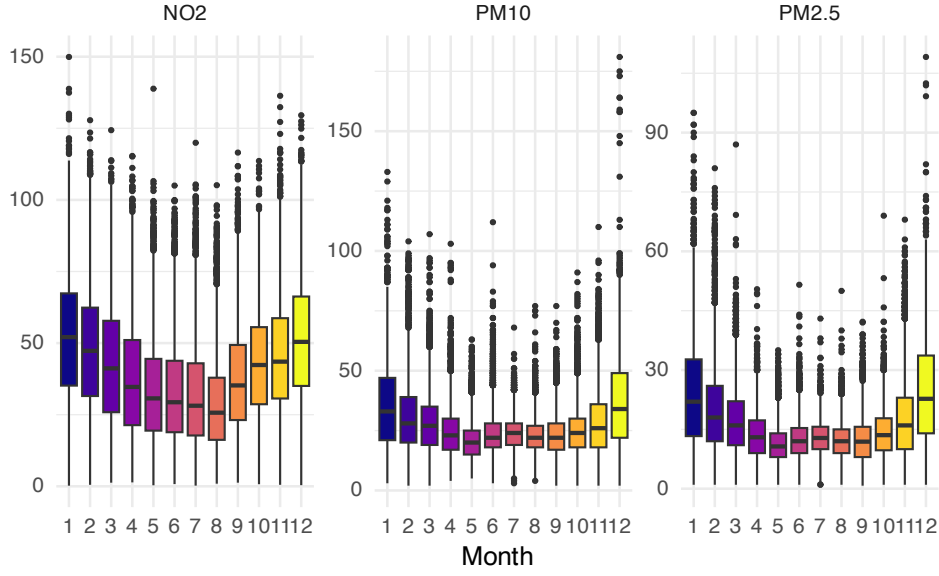

Fig. 2 Boxplots for months. Values in  $\mu\text{g}/\text{m}^3$ ; 2011–2022.

## 1.2 Inter-stations distances

As an additional exploratory tool, Table 1 provides the distances between monitoring sites. Among traffic stations, Francia is the most distant from the other traffic sites (nearest traffic neighbour: Tiburtina, 7.77 km). This spatial configuration may partly contribute to the poorer  $\text{NO}_2$  LOSO-CV performance at Francia.

## 2 Additional methodological details

### 2.1 Additional validation metrics definitions

We provide here an additional validation metric defined for LOSO-CV framework. As well as the ones in the main text, it can be easily extended to the case in which an held-out year is employed, instead of held-out site  $s_i$ . The metric is stated in a general form. In the current formalisation the number of years is  $T = 12$ , and number of days within years is  $L = 365$ . As well as the other metrics, even this metric can be computed averaging also by number of station as well.

**Table 1** Pairwise distances (km) between Rome monitoring stations.

|     | PRE   | FRA   | VAD   | CDG   | CAV   | FER   | BUF   | CIP   | MGR   | TIB   | ARE   | MAL   | CIN   |
|-----|-------|-------|-------|-------|-------|-------|-------|-------|-------|-------|-------|-------|-------|
| PRE | 0     | 9.08  | 5.95  | 22.86 | 10.84 | 6.47  | 6.88  | 8.13  | 2.73  | 2.76  | 5.57  | 16.33 | 3.87  |
| FRA | 9.08  | 0     | 3.50  | 18.06 | 15.80 | 9.28  | 5.32  | 4.92  | 7.87  | 7.77  | 5.96  | 13.08 | 12.93 |
| VAD | 5.95  | 3.50  | 0     | 20.55 | 12.58 | 8.26  | 2.76  | 5.74  | 5.54  | 4.29  | 5.06  | 14.87 | 9.80  |
| CDG | 22.86 | 18.06 | 20.55 | 0     | 32.86 | 17.12 | 23.11 | 15.17 | 20.16 | 23.57 | 17.37 | 6.78  | 25.36 |
| CAV | 10.84 | 15.80 | 12.58 | 32.86 | 0     | 17.29 | 10.55 | 17.69 | 13.44 | 9.35  | 15.70 | 26.68 | 10.92 |
| FER | 6.47  | 9.28  | 8.26  | 17.12 | 17.29 | 0     | 10.71 | 5.05  | 3.90  | 8.36  | 3.37  | 10.37 | 8.26  |
| BUF | 6.88  | 5.32  | 2.76  | 23.11 | 10.55 | 10.71 | 0     | 8.49  | 7.47  | 4.34  | 7.68  | 17.59 | 10.41 |
| CIP | 8.13  | 4.92  | 5.74  | 15.17 | 17.69 | 5.05  | 8.49  | 0     | 5.71  | 8.42  | 2.69  | 9.17  | 11.42 |
| MGR | 2.73  | 7.87  | 5.54  | 20.16 | 13.44 | 3.90  | 7.47  | 5.71  | 0     | 4.48  | 3.04  | 13.60 | 5.70  |
| TIB | 2.76  | 7.77  | 4.29  | 23.57 | 9.35  | 8.36  | 4.34  | 8.42  | 4.48  | 0     | 6.36  | 17.33 | 6.07  |
| ARE | 5.57  | 5.96  | 5.06  | 17.37 | 15.70 | 3.37  | 7.68  | 2.69  | 3.04  | 6.36  | 0     | 10.99 | 8.73  |
| MAL | 16.33 | 13.08 | 14.87 | 6.78  | 26.68 | 10.37 | 17.59 | 9.17  | 13.60 | 17.33 | 10.99 | 0     | 18.63 |
| CIN | 3.87  | 12.93 | 9.80  | 25.36 | 10.92 | 8.26  | 10.41 | 11.42 | 5.70  | 6.07  | 8.73  | 18.63 | 0     |

Station codes: ARE = Arenula; BUF = Bufalotta; CAV = Cavaliere; CDG = Castel di Guido; CIN = Cinecitta; CIP = Cipro; FER = Fermi; FRA = Francia; MAL = Malagrotta; MGR = Magna Grecia; PRE = Preneste; TIB = Tiburtina; VAD = Villa Ada

$$R_{\text{train}}^1(\mathbf{s}_i) = 1 - \frac{\sum_{t=1}^T \sum_{\ell=1}^L \rho_{\tau}(y_{t\ell}^{\text{obs}}(\mathbf{s}_i) - \widehat{q}_{t\ell}^{\tau}(\mathbf{s}_{-i}))}{\sum_{t=1}^T \sum_{\ell=1}^L \rho_{\tau}(y_{t\ell}^{\text{obs}}(\mathbf{s}_i) - q_{\text{emp}}^{\tau}(\mathbf{s}_{-i}))} \quad (1)$$

In this case,  $\widehat{q}_{t\ell}^{\tau}(\mathbf{s}_{-i})$  is the estimated quantile from the training set evaluated in the training set itself. This metric should be, therefore, slightly more compliant to the training set with respect to the other  $R^1$  specification with different baseline deviance.

## 2.2 MCMC settings and convergence diagnostics

For each couple (pollutant,  $\tau$ ) two chains of 50,000 iterations were run, plus additional 25,000 burn-in. After 50 thinning, this yielded 2000 iterations (1000 for each chain). Convergence was assessed using (i) trace plots, (ii) potential scale reduction factor ( $\hat{R}$ ), and (iii) effective sample size (ESS), computed with `coda` Rstudio package (Plummer et al. 2006). All parameters were in adequate ranges, with ESS always  $> 1000$  and  $\hat{R} < 1.05$ . All computations were performed in R on a MacBook Air (Apple M2, 8 GB RAM, macOS). Typical runtime for one tau and one pollutant usually was around 10-20 minutes.

## 2.3 Kriging details

For each pollutant, model fitting is performed on a transformed response scale, using square-root for  $\text{NO}_2$  and  $\log(1+x)$  for particulate matter. Spatial prediction is carried out on the  $1 \text{ km} \times 1 \text{ km}$  grid (1292 cells) via Bayesian kriging of the spatial GP-intercept. Since the GP is specified with hierarchical centering representation

$\beta_0^\tau + \mathbf{z}(\mathbf{s})^\top \boldsymbol{\beta}_{sp}^\tau$ , kriging is applied to the mean-centred spatial GP and the mean component is added back afterwards, yielding a grid-level estimate of  $\beta_0^\tau(\mathbf{s})$ . Daily conditional quantile surfaces on the transformed scale are then reconstructed by adding the fixed-effects linear predictor  $\mathbf{x}_{t\ell}(\mathbf{s})^\top \boldsymbol{\beta}_{st}^\tau$  (with covariates standardised consistently with model fitting). Final exposure surfaces are reported in  $\mu\text{g}/\text{m}^3$  by applying the inverse transformation, i.e. squaring predictions for  $\text{NO}_2$  and exponential minus one for PMs.

### 3 Model screening

We inspected pairwise correlations computed on the station-level dataset used for fitting the candidate QR models. Pearson correlation coefficients were calculated after preprocessing and standardisation and summarised through correlation matrices (Table 3). We report (i) the correlation structure among spatio-temporal covariates including 1-day lagged terms, and (ii) the correlation matrix among spatial predictors. Pairs showing high absolute correlation ( $|r| \geq 0.75$ ) were flagged as potentially problematic and removed from the candidate models (Table 2). In addition and for the same reason, at most one spatial predictor was therefore admitted in each model specification. Therefore, candidate models were generated by enumerating all subsets of the spatio-temporal covariates and spatial predictors under such constraints (both with and without station fixed effects). We enumerated a pre-specified grid of 8,192 candidate model specifications sharing a common baseline temporal component  $\sin(2\pi \text{ day}/365) + \cos(2\pi \text{ day}/365) + \text{year} + \text{day}$  type. Final admissible specifications after multi-collinearity checks resulted in 1,500, comprising 1,200 models without station-specific intercepts and 300 models including those (and, hence, without spatial predictors included).

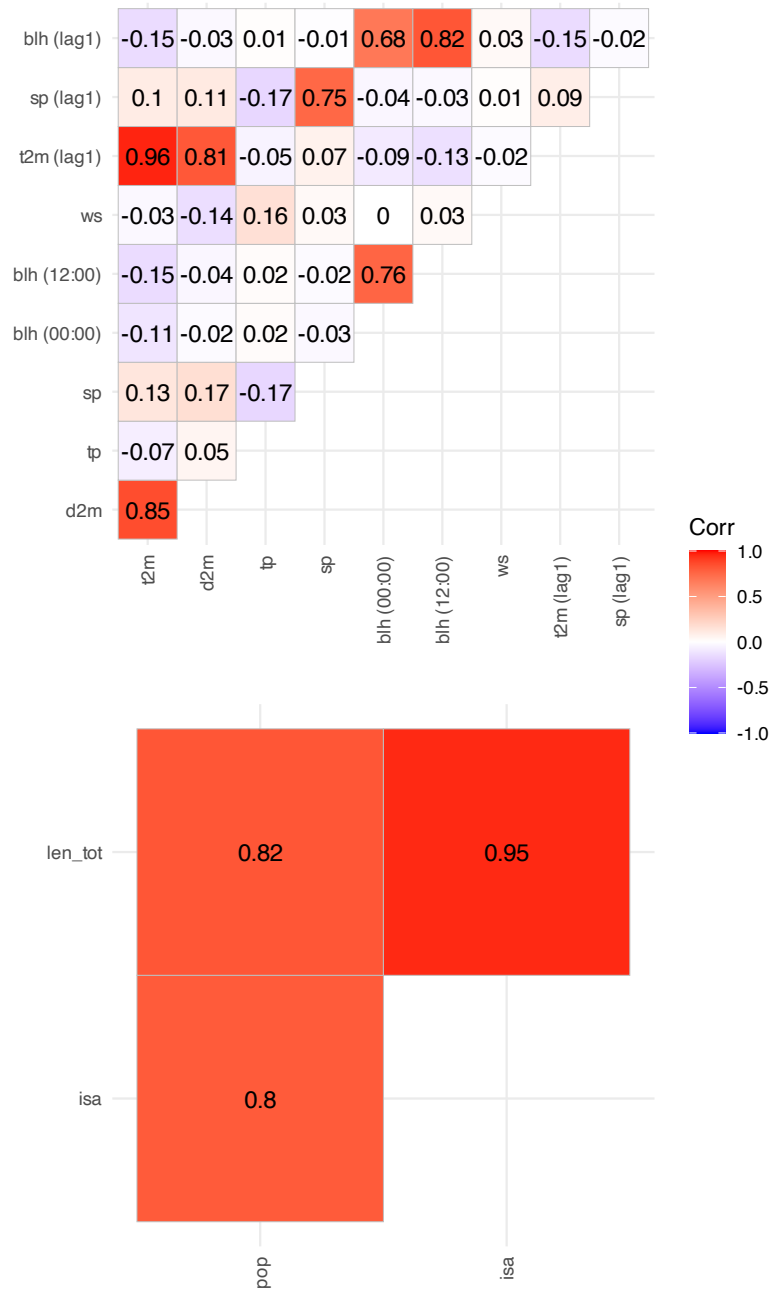

**Fig. 3** Correlation matrices among candidate covariates used for multicollinearity screening in model selection.

**Table 2** Forbidden covariate pairs excluded from the candidate model set due to high correlation.

| Covariate 1 | Covariate 2 |
|-------------|-------------|
| t2m (mean)  | t2m (lag1)  |
| t2m (mean)  | d2m (mean)  |
| blh (00:00) | blh (12:00) |
| blh (12:00) | blh (lag1)  |
| sp (mean)   | sp (lag1)   |

## 4 Model comparison via DIC

Full spatio-temporal models were evaluated using Deviance Information Criterion (DIC, Spiegelhalter et al. (2002)). DIC is reported here only as a comparative diagnostic to quantify the contribution of model components under the AL working likelihood, and not as a primary model-selection criterion. In sample explanatory qualities of the full model were then compared to several alternative formulations, obtained by selectively removing blocks of predictors (e.g., spatial or temporal covariates) and/or the spatial Gaussian-process component.

In Table 3 we compared models using DIC, for each couple (pollutant,  $\tau$ ). Hence, we considered (M1) full model with GP, (M2) full model without GP, (M3) empty model with GP only, (M4) temporal components-only, with GP, and lastly (M5) full model with GP without spatial covariates included.

In general, the largest reductions in DIC are associated with including the spatial GP component (M1 vs M2) across pollutants and quantile levels. Temporal components also contribute substantially, as shown by the poor fit of the intercept-only GP model (M3). In contrast, removing meteorological covariates yields only modest changes in DIC (M1 vs M4), suggesting a limited incremental contribution beyond the baseline temporal structure and spatial GP. Finally, excluding spatial covariates from the GP mean has a negligible impact (M1 vs M5).

## 5 Robustness and calibration checks

### 5.1 Prior sensitivity

In this section, tables for prior sensitivity at  $\tau = 0.75, 0.90, 0.95$  are presented. For all couples (pollutant,  $\tau$ ) interpretation are similar to the ones included in the main text for forest plots for  $\tau = 0.90$ , showing proper overlapping across different parameters and good identifiability.

**Table 3** DIC by pollutant and  $\tau$ .

| Pollutant         | $\tau$ | DIC    |        |        |        |        |
|-------------------|--------|--------|--------|--------|--------|--------|
|                   |        | M1     | M2     | M3     | M4     | M5     |
| NO <sub>2</sub>   | 0.75   | 163534 | 209111 | 201012 | 163764 | 163534 |
| NO <sub>2</sub>   | 0.90   | 178048 | 217808 | 216281 | 178319 | 178048 |
| NO <sub>2</sub>   | 0.95   | 190073 | 225906 | 228151 | 190320 | 190074 |
| PM <sub>10</sub>  | 0.75   | 55924  | 59259  | 68688  | 56410  | 55925  |
| PM <sub>10</sub>  | 0.90   | 68410  | 71307  | 85058  | 68792  | 68410  |
| PM <sub>10</sub>  | 0.95   | 79202  | 82101  | 95306  | 79554  | 79203  |
| PM <sub>2.5</sub> | 0.75   | 47156  | 48217  | 59899  | 47589  | 47156  |
| PM <sub>2.5</sub> | 0.90   | 52597  | 53732  | 71906  | 53060  | 52598  |
| PM <sub>2.5</sub> | 0.95   | 57463  | 58716  | 78397  | 57889  | 57462  |

Models: M1 = full + GP; M2 = full (no GP); M3 = empty + GP; M4 = trend-only + GP; M5 = full + GP without spatial variables in hierarchical centering.

## 5.2 In-sample calibration

Table 13 and 14 show additional summaries for in sample computed  $p$  metric. In the first output, we provide a brief insight regarding spatial variability: all metrics were computed by grouping stations, reaching always values very close to nominal quantile levels with very low inter-stations variability (the maximum distance is for PM<sub>10</sub> and  $\tau = 0.75$ , equal to 0.07). The second table shows aggregated summaries year-wise: we can underline slightly higher variability with respect to the former, especially at  $\tau = 0.75$  but, in average, all coverages are close to the nominal level.

## 5.3 Residual temporal dependence ( $\tau = 0.90$ )

Residual temporal dependence was assessed via the station-level autocorrelation function of the residual defined as  $r_{t\ell}(\mathbf{s}) = \mathbb{I}\{y_{t\ell}(\mathbf{s}) \leq \widehat{q}_{t\ell}^{\tau}(\mathbf{s})\} - \tau$ , computed on daily series for  $\tau = 0.90$ . Across pollutants, the lag 1 autocorrelation represented in Table 15 is moderate (median  $\approx 0.40$ – $0.49$ ), while the lag-7 autocorrelation is smaller (median  $\approx 0.13$ – $0.17$ ), indicating daily temporal persistence not fully removed by the included seasonal/trend terms and meteorological covariates. This supports considering a latent spatio-temporal component (e.g., AR evolution of the spatial GP) as a natural extension of the work.

# 6 Extended CV results

In this section, complete cross-validation results for  $\tau = 0.75, 0.90, 0.95$  are provided.

## 6.1 LOSO CV

Tables 16–18, 19–21, and 22–24 show spatial cross-validation performances across different pollutant and quantiles. Main patterns are consistent with those summarised in

the main text: Francia station shows the poorest performances for NO<sub>2</sub>, especially for  $\tau = 0.75$ .

## 6.2 LOYO CV

Tables 25–27, 28–30, and 31–33 indicate good temporal predictive performances across pollutants and quantile levels, with median  $p$  close to the nominal  $\tau$  and low year-to-year variability. A small number of held-out years show larger deviations from nominal quantile levels, particularly for NO<sub>2</sub>, while PM<sub>10</sub> and PM<sub>2.5</sub> remain overall stable.

## 6.3 FF-LOYO CV

Tables 34–36, 37–39, and 40–42 are mostly consistent with the corresponding LOYO summaries, indicating stable prospective performance in the most recent period (2019–2022). For NO<sub>2</sub>, the  $p$  metric remains close to nominal across quantile levels, with only modest differences relative to LOYO. For PM<sub>10</sub> and PM<sub>2.5</sub>, FF-LOYO shows slightly lower calibration in some folds.

# 7 Additional fixed-effects results

## 7.1 Re-scaled output ( $\tau = 0.90$ )

We report in this subsection same fixed-effects outputs as the one in the main text (i.e. the forest plots for year/day type and spatio-temporal components, the table for spatial fixed effects), but re-scaling each covariate by its standard deviation. All values must be referred to transformed response values (square-root for NO<sub>2</sub>,  $\log(1 + x)$  for PMs).

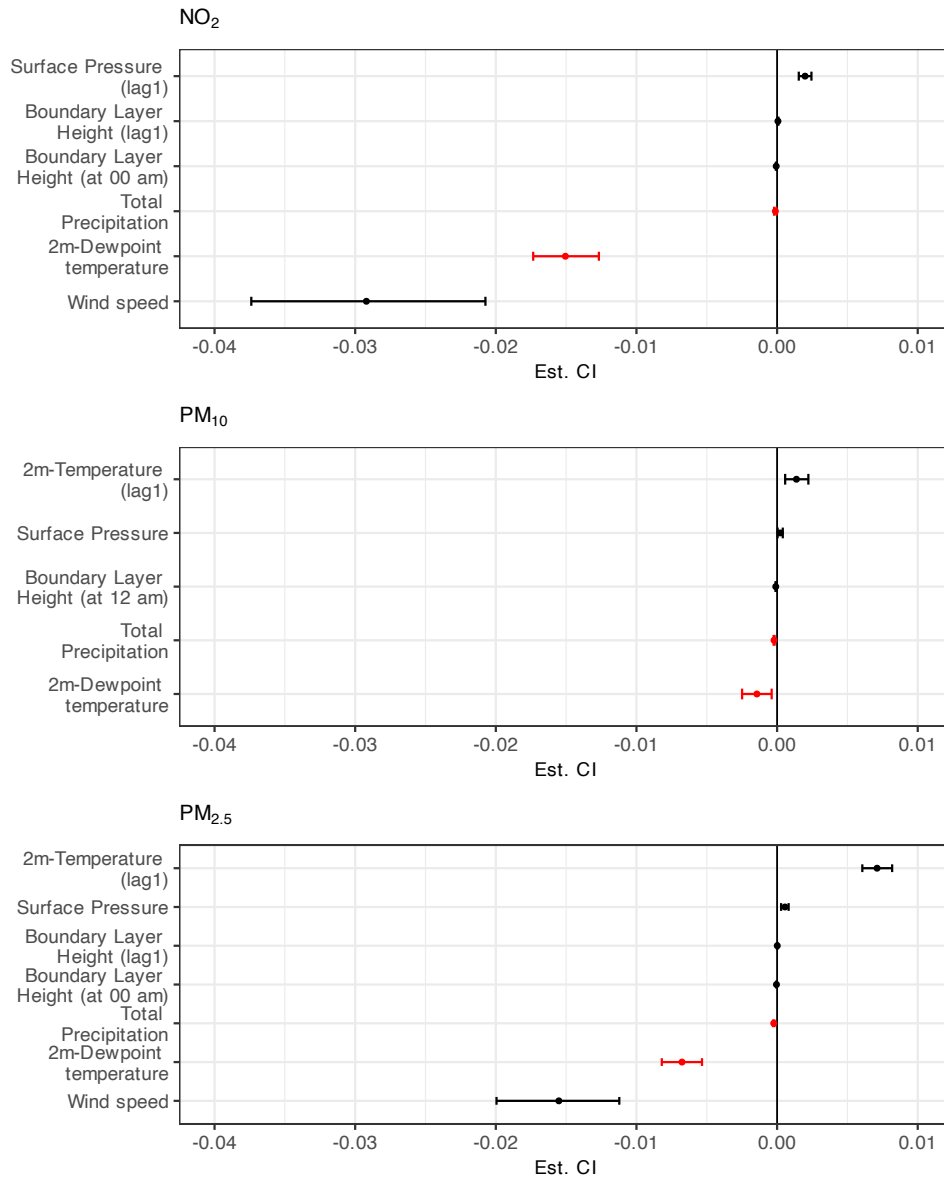

**Fig. 4** Estimated 95% credible intervals for fixed effects at  $\tau = 0.90$ . Responses were transformed (square-root for NO<sub>2</sub>;  $\log(1 + x)$  for PMs) while covariates were expressed in their original scales. Red markers denote covariates shared by the three best models.

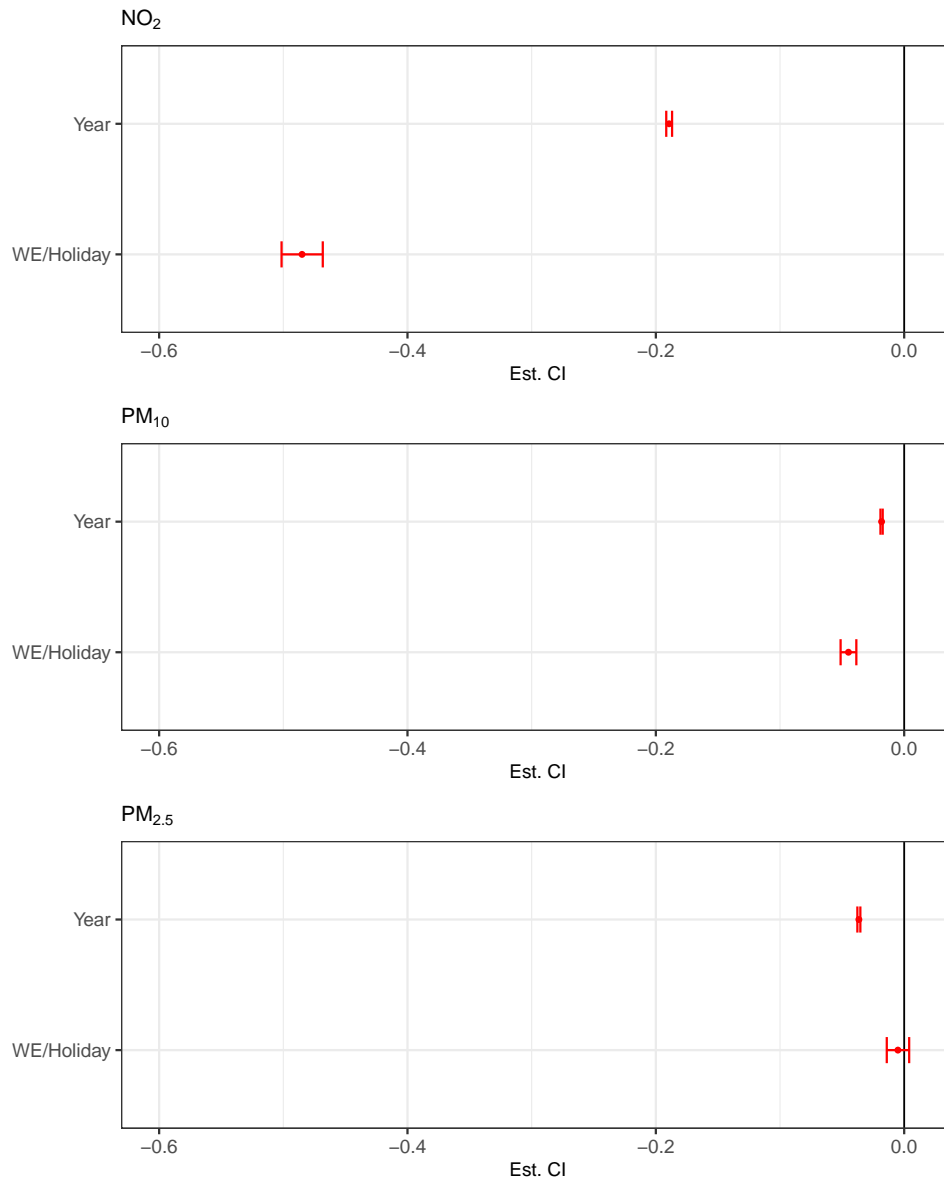

**Fig. 5** Estimated 95% credible intervals for year and weekend/holidays temporal components' fixed effects at  $\tau = 0.90$ . Responses were transformed (square-root for NO<sub>2</sub>;  $\log(1 + x)$  for PMs) while covariates were expressed in their original scales. All plotted covariates were fixed in the model selection and hence shared by the three best models.

## 7.2 Fixed-effects summaries

We report here fixed-effect posterior summaries, including in Tables 44–46, 47–49, and 50–52 temporal components, spatio-temporal covariates, and spatial predictors. All results are re-scaled using covariates' standard deviations but are to be referred to transformed response variables (square-root for  $\text{NO}_2$  and  $\log(1 + x)$  for PMs).

**Table 4** Prior sensitivity summaries for  $\text{NO}_2$  at  $\tau = 0.75$  across scenarios.

| Param.                | M0     |                 |                 | MB     |                 |                 | MS     |                 |                 | MP     |                 |                 |
|-----------------------|--------|-----------------|-----------------|--------|-----------------|-----------------|--------|-----------------|-----------------|--------|-----------------|-----------------|
|                       | Med    | CI <sub>ℓ</sub> | CI <sub>u</sub> |
| $\beta_{\text{d2m}}$  | -0.058 | -0.075          | -0.041          | -0.057 | -0.074          | -0.041          | -0.058 | -0.074          | -0.041          | -0.058 | -0.075          | -0.040          |
| $\beta_{\text{tp}}$   | -0.017 | -0.024          | -0.009          | -0.017 | -0.024          | -0.009          | -0.017 | -0.024          | -0.009          | -0.017 | -0.024          | -0.009          |
| $\sigma^T$            | 0.303  | 0.300           | 0.305           | 0.303  | 0.300           | 0.305           | 0.303  | 0.300           | 0.305           | 0.303  | 0.300           | 0.305           |
| $\phi_{\beta_0}$      | 0.226  | 0.047           | 0.660           | 0.222  | 0.044           | 0.659           | 0.333  | 0.112           | 0.753           | 0.254  | 0.017           | 0.844           |
| $\sigma_{\beta_0}$    | 1.158  | 0.692           | 2.482           | 1.156  | 0.703           | 2.556           | 0.839  | 0.587           | 1.355           | 1.137  | 0.662           | 3.426           |
| $\beta_0(\text{CDG})$ | 4.290  | 4.263           | 4.318           | 4.290  | 4.263           | 4.319           | 4.290  | 4.263           | 4.318           | 4.291  | 4.264           | 4.318           |
| $\beta_0(\text{MAL})$ | 5.299  | 5.271           | 5.332           | 5.299  | 5.271           | 5.326           | 5.298  | 5.271           | 5.328           | 5.299  | 5.272           | 5.328           |
| $\beta_0(\text{CIP})$ | 7.275  | 7.248           | 7.301           | 7.275  | 7.248           | 7.302           | 7.275  | 7.248           | 7.302           | 7.274  | 7.249           | 7.301           |
| $\beta_0(\text{MGR})$ | 8.160  | 8.133           | 8.185           | 8.160  | 8.133           | 8.188           | 8.159  | 8.133           | 8.185           | 8.159  | 8.133           | 8.190           |
| $\beta_0(\text{FRA})$ | 8.229  | 8.201           | 8.258           | 8.230  | 8.201           | 8.264           | 8.229  | 8.201           | 8.262           | 8.229  | 8.199           | 8.263           |

CI<sub>ℓ</sub> and CI<sub>u</sub> denote the 2.5% and 97.5% quantiles, respectively. Values refer to standardised covariates and the transformed target variable used for model fitting. Covariate codes: d2m = 2 m dewpoint temperature; tp = total precipitation. Station codes: CDG = Castel di Guido; CIP = Cipro; FRA = Francia; MGR = Magna Grecia; MAL = Malagrotta.

**Table 5** Prior sensitivity summaries for PM<sub>10</sub> at  $\tau = 0.75$  across scenarios.

| Param.             | M0     |                 |                 | MB     |                 |                 | MS     |                 |                 | MP     |                 |                 |
|--------------------|--------|-----------------|-----------------|--------|-----------------|-----------------|--------|-----------------|-----------------|--------|-----------------|-----------------|
|                    | Med    | CI <sub>ℓ</sub> | CI <sub>u</sub> |
| $\beta_{d2m}$      | -0.023 | -0.030          | -0.016          | -0.023 | -0.030          | -0.016          | -0.023 | -0.030          | -0.016          | -0.023 | -0.030          | -0.016          |
| $\beta_{+tp}$      | -0.015 | -0.018          | -0.012          | -0.015 | -0.018          | -0.012          | -0.015 | -0.018          | -0.012          | -0.015 | -0.018          | -0.012          |
| $\sigma^\tau$      | 0.119  | 0.118           | 0.120           | 0.119  | 0.118           | 0.120           | 0.119  | 0.118           | 0.120           | 0.119  | 0.118           | 0.120           |
| $\phi^{\beta_0}$   | 0.061  | 0.007           | 0.326           | 0.057  | 0.008           | 0.318           | 0.063  | 0.015           | 0.280           | 0.023  | 0.000           | 0.245           |
| $\sigma^{\beta_0}$ | 0.239  | 0.135           | 0.587           | 0.241  | 0.139           | 0.580           | 0.231  | 0.158           | 0.385           | 0.333  | 0.152           | 2.263           |
| $\beta_0$ (CDG)    | 3.443  | 3.431           | 3.455           | 3.442  | 3.431           | 3.453           | 3.442  | 3.430           | 3.454           | 3.443  | 3.431           | 3.454           |
| $\beta_0$ (MAL)    | 3.618  | 3.607           | 3.630           | 3.618  | 3.606           | 3.630           | 3.618  | 3.607           | 3.630           | 3.618  | 3.607           | 3.629           |
| $\beta_0$ (CIP)    | 3.538  | 3.528           | 3.548           | 3.538  | 3.528           | 3.549           | 3.538  | 3.528           | 3.549           | 3.538  | 3.527           | 3.548           |
| $\beta_0$ (MGR)    | 3.671  | 3.658           | 3.681           | 3.670  | 3.659           | 3.681           | 3.670  | 3.659           | 3.682           | 3.670  | 3.657           | 3.681           |
| $\beta_0$ (FRA)    | 3.430  | 3.418           | 3.439           | 3.430  | 3.419           | 3.440           | 3.429  | 3.419           | 3.440           | 3.430  | 3.418           | 3.440           |

CI<sub>ℓ</sub> and CI<sub>u</sub> denote the 2.5% and 97.5% quantiles, respectively. Values refer to standardised covariates and the transformed target variable used for model fitting. Covariate codes: d2m = 2 m dewpoint temperature; tp = total precipitation. Station codes: CDG = Castel di Guido; CIP = Cipro; FRA = Francia; MGR = Magna Grecia; MAL = Malagrofta.

**Table 6** Prior sensitivity summaries for  $PM_{2.5}$  at  $\tau = 0.75$  across scenarios.

| Param.             | M0     |              |         | MB     |              |         | MS     |              |         | MP     |              |         |
|--------------------|--------|--------------|---------|--------|--------------|---------|--------|--------------|---------|--------|--------------|---------|
|                    | Med    | CI $_{\ell}$ | CI $_u$ |
| $\beta_{d2m}$      | -0.045 | -0.054       | -0.036  | -0.045 | -0.054       | -0.036  | -0.045 | -0.054       | -0.036  | -0.045 | -0.054       | -0.036  |
| $\beta_{tp}$       | -0.022 | -0.026       | -0.016  | -0.021 | -0.027       | -0.017  | -0.022 | -0.027       | -0.016  | -0.021 | -0.026       | -0.016  |
| $\sigma^{\tau}$    | 0.139  | 0.137        | 0.140   | 0.139  | 0.137        | 0.140   | 0.139  | 0.137        | 0.140   | 0.139  | 0.137        | 0.140   |
| $\phi_{\beta_0}$   | 0.058  | 0.005        | 0.381   | 0.058  | 0.007        | 0.359   | 0.062  | 0.011        | 0.329   | 0.018  | 0.001        | 0.281   |
| $\sigma_{\beta_0}$ | 0.254  | 0.144        | 0.652   | 0.260  | 0.147        | 0.605   | 0.248  | 0.166        | 0.414   | 0.349  | 0.162        | 1.616   |
| $\beta_0$ (CDG)    | 2.863  | 2.849        | 2.877   | 2.863  | 2.849        | 2.877   | 2.862  | 2.849        | 2.878   | 2.863  | 2.850        | 2.878   |
| $\beta_0$ (MAL)    | 2.964  | 2.951        | 2.978   | 2.964  | 2.950        | 2.977   | 2.963  | 2.950        | 2.977   | 2.963  | 2.949        | 2.976   |
| $\beta_0$ (CIP)    | 2.957  | 2.944        | 2.969   | 2.957  | 2.944        | 2.970   | 2.957  | 2.943        | 2.969   | 2.958  | 2.945        | 2.969   |
| $\beta_0$ (FRA)    | 3.094  | 3.083        | 3.107   | 3.095  | 3.082        | 3.108   | 3.095  | 3.082        | 3.107   | 3.094  | 3.082        | 3.106   |

CI $_{\ell}$  and CI $_u$  denote the 2.5% and 97.5% quantiles, respectively. Covariate codes: d2m = 2 m dewpoint temperature; tp = total precipitation. Values refer to standardised covariates and the transformed target variable used for model fitting. Station codes: CDG = Castel di Guido; CIP = Cipro; FRA = Francia; MAL = Malagrotta.

**Table 7** Prior sensitivity summaries for NO<sub>2</sub> at  $\tau = 0.90$  across scenarios.

| Param.             | M0     |                 | MB     |                 | MS     |                 | MP     |                 |
|--------------------|--------|-----------------|--------|-----------------|--------|-----------------|--------|-----------------|
|                    | Med    | CI <sub>ℓ</sub> |
| $\beta_{d2m}$      | -0.088 | -0.102          | -0.074 | -0.102          | -0.088 | -0.101          | -0.088 | -0.101          |
| $\beta_{+tp}$      | -0.010 | -0.018          | -0.004 | -0.018          | -0.010 | -0.019          | -0.010 | -0.018          |
| $\sigma^{\tau}$    | 0.166  | 0.164           | 0.167  | 0.164           | 0.166  | 0.164           | 0.166  | 0.164           |
| $\phi_{\beta_0}$   | 0.215  | 0.037           | 0.623  | 0.219           | 0.345  | 0.129           | 0.240  | 0.022           |
| $\sigma_{\beta_0}$ | 1.131  | 0.705           | 2.546  | 1.143           | 0.806  | 0.557           | 1.124  | 0.656           |
| $\beta_0$ (CDG)    | 4.879  | 4.851           | 4.907  | 4.879           | 4.879  | 4.853           | 4.880  | 4.851           |
| $\beta_0$ (MAL)    | 5.911  | 5.880           | 5.937  | 5.911           | 5.911  | 5.882           | 5.910  | 5.882           |
| $\beta_0$ (CIP)    | 7.757  | 7.732           | 7.783  | 7.757           | 7.757  | 7.733           | 7.756  | 7.731           |
| $\beta_0$ (MGR)    | 8.660  | 8.636           | 8.685  | 8.660           | 8.660  | 8.636           | 8.660  | 8.638           |
| $\beta_0$ (FRA)    | 8.782  | 8.753           | 8.809  | 8.781           | 8.781  | 8.750           | 8.781  | 8.753           |

CI<sub>ℓ</sub> and CI<sub>u</sub> denote the 2.5% and 97.5% quantiles, respectively. Covariate codes: d2m = 2 m dewpoint temperature; tp = total precipitation. Values refer to standardised covariates and the transformed target variable used for model fitting. Station codes: CDG = Castel di Guido; CIP = Cipro; FRA = Francia; MGR = Magna Grecia; MAL = Malagrotta.

**Table 8** Prior sensitivity summaries for  $PM_{10}$  at  $\tau = 0.90$  across scenarios.

| Param.             | M0     |                 |                 | MB     |                 |                 | MS     |                 |                 | MP     |                 |                 |
|--------------------|--------|-----------------|-----------------|--------|-----------------|-----------------|--------|-----------------|-----------------|--------|-----------------|-----------------|
|                    | Med    | CI <sub>ℓ</sub> | CI <sub>u</sub> |
| $\beta_{d2m}$      | -0.009 | -0.014          | -0.002          | -0.008 | -0.015          | -0.003          | -0.009 | -0.014          | -0.003          | -0.009 | -0.015          | -0.002          |
| $\beta_{tp}$       | -0.018 | -0.021          | -0.015          | -0.018 | -0.021          | -0.015          | -0.018 | -0.021          | -0.015          | -0.018 | -0.021          | -0.015          |
| $\sigma^T$         | 0.065  | 0.064           | 0.065           | 0.065  | 0.064           | 0.065           | 0.065  | 0.064           | 0.065           | 0.065  | 0.064           | 0.065           |
| $\phi_{\beta_0}$   | 0.056  | 0.006           | 0.314           | 0.056  | 0.007           | 0.289           | 0.065  | 0.016           | 0.279           | 0.024  | 0.002           | 0.243           |
| $\sigma_{\beta_0}$ | 0.239  | 0.14            | 0.629           | 0.239  | 0.134           | 0.642           | 0.228  | 0.153           | 0.388           | 0.309  | 0.149           | 1.186           |
| $\beta_0$ (CDG)    | 3.65   | 3.64            | 3.661           | 3.65   | 3.639           | 3.662           | 3.65   | 3.639           | 3.661           | 3.65   | 3.639           | 3.663           |
| $\beta_0$ (MAL)    | 3.828  | 3.817           | 3.839           | 3.828  | 3.818           | 3.84            | 3.827  | 3.817           | 3.839           | 3.827  | 3.818           | 3.838           |
| $\beta_0$ (CIP)    | 3.719  | 3.71            | 3.729           | 3.719  | 3.71            | 3.728           | 3.719  | 3.711           | 3.729           | 3.719  | 3.711           | 3.728           |
| $\beta_0$ (MGR)    | 3.881  | 3.871           | 3.892           | 3.881  | 3.871           | 3.892           | 3.881  | 3.87            | 3.892           | 3.881  | 3.871           | 3.891           |
| $\beta_0$ (FRA)    | 3.622  | 3.611           | 3.632           | 3.623  | 3.611           | 3.633           | 3.622  | 3.612           | 3.633           | 3.623  | 3.612           | 3.634           |

CI<sub>ℓ</sub> and CI<sub>u</sub> denote the 2.5% and 97.5% quantiles, respectively. Covariate codes: d2m = 2 m dewpoint temperature; tp = total precipitation. Values refer to standardised covariates and the transformed target variable used for model fitting. Station codes: CDG = Castel di Guido; CIP = Cipro; FRA = Francia; MGR = Magna Grecia; MAL = Malagrotta.

**Table 9** Prior sensitivity summaries for  $PM_{2.5}$  at  $\tau = 0.90$  across scenarios.

| Param.             | M0     |                 |                 | MB     |                 |                 | MS     |                 |                 | MP     |                 |                 |
|--------------------|--------|-----------------|-----------------|--------|-----------------|-----------------|--------|-----------------|-----------------|--------|-----------------|-----------------|
|                    | Med    | CI <sub>ℓ</sub> | CI <sub>u</sub> |
| $\beta_{d2m}$      | -0.039 | -0.048          | -0.031          | -0.039 | -0.048          | -0.031          | -0.039 | -0.048          | -0.032          | -0.039 | -0.048          | -0.032          |
| $\beta_{tp}$       | -0.02  | -0.024          | -0.016          | -0.02  | -0.024          | -0.016          | -0.02  | -0.024          | -0.016          | -0.02  | -0.024          | -0.016          |
| $\sigma^{\tau}$    | 0.072  | 0.071           | 0.073           | 0.072  | 0.071           | 0.073           | 0.072  | 0.071           | 0.073           | 0.072  | 0.071           | 0.073           |
| $\phi_{\beta_0}$   | 0.054  | 0.006           | 0.318           | 0.051  | 0.005           | 0.369           | 0.089  | 0.015           | 0.386           | 0.017  | 0.001           | 0.312           |
| $\sigma_{\beta_0}$ | 0.254  | 0.143           | 0.588           | 0.259  | 0.146           | 0.719           | 0.184  | 0.123           | 0.313           | 0.333  | 0.153           | 1.531           |
| $\beta_0$ (CDG)    | 3.113  | 3.1             | 3.127           | 3.113  | 3.101           | 3.127           | 3.113  | 3.1             | 3.126           | 3.113  | 3.101           | 3.127           |
| $\beta_0$ (MAL)    | 3.234  | 3.222           | 3.248           | 3.235  | 3.221           | 3.249           | 3.234  | 3.22            | 3.248           | 3.234  | 3.219           | 3.248           |
| $\beta_0$ (CIP)    | 3.175  | 3.163           | 3.188           | 3.175  | 3.163           | 3.189           | 3.176  | 3.162           | 3.188           | 3.176  | 3.164           | 3.189           |
| $\beta_0$ (FRA)    | 3.292  | 3.281           | 3.304           | 3.292  | 3.282           | 3.303           | 3.292  | 3.282           | 3.303           | 3.292  | 3.282           | 3.303           |

CI<sub>ℓ</sub> and CI<sub>u</sub> denote the 2.5% and 97.5% quantiles, respectively. Covariate codes: d2m = 2 m dewpoint temperature; tp = total precipitation. Values refer to standardised covariates and the transformed target variable used for model fitting. Station codes: CDG = Castel di Guido; CIP = Cipro; FRA = Francia; MAL = Malagrotta.

**Table 10** Prior sensitivity summaries for  $\text{NO}_2$  at  $\tau = 0.95$  across scenarios.

| Param.                | M0     |                 |                 | MB     |                 |                 | MS     |                 |                 | MP     |                 |                 |
|-----------------------|--------|-----------------|-----------------|--------|-----------------|-----------------|--------|-----------------|-----------------|--------|-----------------|-----------------|
|                       | Med    | CI <sub>ℓ</sub> | CI <sub>u</sub> |
| $\beta_{d2m}$         | -0.084 | -0.098          | -0.07           | -0.085 | -0.098          | -0.071          | -0.084 | -0.098          | -0.07           | -0.084 | -0.098          | -0.07           |
| $\beta_{tp}$          | -0.007 | -0.014          | 0               | -0.007 | -0.014          | 0.001           | -0.007 | -0.015          | 0.001           | -0.007 | -0.014          | 0               |
| $\sigma^T$            | 0.098  | 0.097           | 0.098           | 0.098  | 0.097           | 0.098           | 0.098  | 0.097           | 0.098           | 0.098  | 0.097           | 0.098           |
| $\phi_{\beta_0}$      | 0.213  | 0.039           | 0.603           | 0.221  | 0.046           | 0.596           | 0.339  | 0.117           | 0.767           | 0.256  | 0.018           | 0.875           |
| $\sigma_{\beta_0}$    | 1.137  | 0.705           | 2.552           | 1.115  | 0.7             | 2.343           | 0.795  | 0.559           | 1.289           | 1.098  | 0.648           | 3.444           |
| $\beta_0(\text{CDG})$ | 5.182  | 5.15            | 5.215           | 5.182  | 5.151           | 5.213           | 5.183  | 5.151           | 5.216           | 5.182  | 5.151           | 5.215           |
| $\beta_0(\text{MAL})$ | 6.263  | 6.232           | 6.294           | 6.264  | 6.232           | 6.294           | 6.264  | 6.232           | 6.292           | 6.264  | 6.234           | 6.294           |
| $\beta_0(\text{CIP})$ | 8.009  | 7.984           | 8.036           | 8.01   | 7.988           | 8.037           | 8.01   | 7.986           | 8.037           | 8.01   | 7.984           | 8.035           |
| $\beta_0(\text{MGR})$ | 8.946  | 8.921           | 8.972           | 8.947  | 8.924           | 8.973           | 8.946  | 8.922           | 8.973           | 8.947  | 8.922           | 8.972           |
| $\beta_0(\text{FRA})$ | 9.105  | 9.078           | 9.141           | 9.106  | 9.078           | 9.137           | 9.106  | 9.078           | 9.139           | 9.105  | 9.08            | 9.135           |

CI<sub>ℓ</sub> and CI<sub>u</sub> denote the 2.5% and 97.5% quantiles, respectively. Covariate codes: d2m = 2 m dewpoint temperature; tp = total precipitation. Values refer to standardised covariates and the transformed target variable used for model fitting. Station codes: CDG = Castel di Guido; CIP = Cipro; FRA = Francia; MGR = Magna Grecia; MAL = Malagrotta.

**Table 11** Prior sensitivity summaries for  $PM_{10}$  at  $\tau = 0.95$  across scenarios.

| Param.             | M0     |              |         | MB     |              |         | MS     |              |         | MP     |              |         |
|--------------------|--------|--------------|---------|--------|--------------|---------|--------|--------------|---------|--------|--------------|---------|
|                    | Med    | CI $_{\ell}$ | CI $_u$ |
| $\beta_{t_{2m}}$   | 0.015  | 0.01         | 0.022   | 0.016  | 0.01         | 0.022   | 0.016  | 0.009        | 0.022   | 0.015  | 0.009        | 0.022   |
| $\beta_{t_{tp}}$   | -0.018 | -0.021       | -0.015  | -0.018 | -0.021       | -0.015  | -0.018 | -0.021       | -0.015  | -0.018 | -0.021       | -0.015  |
| $\sigma^{\tau}$    | 0.038  | 0.038        | 0.038   | 0.038  | 0.038        | 0.038   | 0.038  | 0.038        | 0.038   | 0.038  | 0.038        | 0.038   |
| $\phi_{\beta_0}$   | 0.05   | 0.005        | 0.323   | 0.05   | 0.006        | 0.281   | 0.057  | 0.012        | 0.284   | 0.019  | 0.001        | 0.208   |
| $\sigma_{\beta_0}$ | 0.242  | 0.134        | 0.605   | 0.236  | 0.136        | 0.579   | 0.225  | 0.154        | 0.379   | 0.342  | 0.151        | 1.709   |
| $\beta_0$ (CDG)    | 3.786  | 3.775        | 3.799   | 3.787  | 3.775        | 3.798   | 3.787  | 3.775        | 3.798   | 3.786  | 3.775        | 3.799   |
| $\beta_0$ (MAL)    | 3.984  | 3.971        | 3.996   | 3.984  | 3.972        | 3.996   | 3.985  | 3.973        | 3.997   | 3.984  | 3.972        | 3.997   |
| $\beta_0$ (CIP)    | 3.848  | 3.836        | 3.859   | 3.847  | 3.836        | 3.859   | 3.848  | 3.837        | 3.859   | 3.848  | 3.836        | 3.858   |
| $\beta_0$ (MGR)    | 4.013  | 4.004        | 4.022   | 4.014  | 4.003        | 4.024   | 4.013  | 4.003        | 4.023   | 4.013  | 4.003        | 4.023   |
| $\beta_0$ (FRA)    | 3.758  | 3.748        | 3.769   | 3.758  | 3.748        | 3.768   | 3.757  | 3.747        | 3.769   | 3.758  | 3.747        | 3.769   |

CI $_{\ell}$  and CI $_u$  denote the 2.5% and 97.5% quantiles, respectively. Covariate codes: t2m = 2 m temperature; tp = total precipitation. Values refer to standardised covariates and the transformed target variable used for model fitting. Station codes: CDG = Castel di Guido; CIP = Cipro; FRA = Francia; MGR = Magna Grecia; MAL = Malagrotta.

**Table 12** Prior sensitivity summaries for  $PM_{2.5}$  at  $\tau = 0.95$  across scenarios.

| Param.             | M0     |                 |                 | MB     |                 |                 | MS     |                 |                 | MP    |                 |                 |
|--------------------|--------|-----------------|-----------------|--------|-----------------|-----------------|--------|-----------------|-----------------|-------|-----------------|-----------------|
|                    | Med    | CI <sub>ℓ</sub> | CI <sub>u</sub> | Med    | CI <sub>ℓ</sub> | CI <sub>u</sub> | Med    | CI <sub>ℓ</sub> | CI <sub>u</sub> | Med   | CI <sub>ℓ</sub> | CI <sub>u</sub> |
| $\beta_{d2m}$      | -0.036 | -0.043          | -0.028          | -0.039 | -0.047          | -0.032          | -0.04  | -0.047          | -0.032          | -0.04 | -0.047          | -0.032          |
| $\beta_{tp}$       | -0.022 | -0.025          | -0.019          | -0.02  | -0.023          | -0.016          | -0.019 | -0.023          | -0.016          | -0.02 | -0.023          | -0.016          |
| $\sigma_\tau$      | 0.041  | 0.041           | 0.041           | 0.041  | 0.04            | 0.041           | 0.041  | 0.041           | 0.041           | 0.041 | 0.041           | 0.041           |
| $\phi_{\beta_0}$   | 0.05   | 0.005           | 0.372           | 0.046  | 0.006           | 0.306           | 0.12   | 0.024           | 0.444           | 0.016 | 0.001           | 0.263           |
| $\sigma_{\beta_0}$ | 0.251  | 0.143           | 0.669           | 0.254  | 0.143           | 0.649           | 0.145  | 0.097           | 0.241           | 0.349 | 0.151           | 1.459           |
| $\beta_0$ (CDG)    | 3.246  | 3.236           | 3.258           | 3.244  | 3.233           | 3.255           | 3.244  | 3.233           | 3.255           | 3.244 | 3.234           | 3.255           |
| $\beta_0$ (MAL)    | 3.385  | 3.375           | 3.396           | 3.384  | 3.373           | 3.395           | 3.384  | 3.374           | 3.396           | 3.384 | 3.373           | 3.396           |
| $\beta_0$ (CIP)    | 3.302  | 3.292           | 3.313           | 3.302  | 3.291           | 3.313           | 3.302  | 3.291           | 3.314           | 3.302 | 3.291           | 3.313           |
| $\beta_0$ (FRA)    | 3.396  | 3.387           | 3.406           | 3.396  | 3.386           | 3.408           | 3.396  | 3.385           | 3.406           | 3.396 | 3.385           | 3.407           |

CI<sub>ℓ</sub> and CI<sub>u</sub> denote the 2.5% and 97.5% quantiles, respectively. Covariate codes: d2m = 2 m dewpoint temperature; tp = total precipitation. Values refer to standardised covariates and the transformed target variable used for model fitting. Station codes: CDG = Castel di Guido; CIP = Cipro; FRA = Francia; MAL = Malagrotta..

**Table 13** In-sample calibration check based on the  $p$  metric.

| Pollutant         | $\tau$ | $p$                  |
|-------------------|--------|----------------------|
| NO <sub>2</sub>   | 0.75   | 0.750 [0.748, 0.752] |
| NO <sub>2</sub>   | 0.90   | 0.900 [0.898, 0.901] |
| NO <sub>2</sub>   | 0.95   | 0.950 [0.950, 0.951] |
| PM <sub>10</sub>  | 0.75   | 0.750 [0.745, 0.757] |
| PM <sub>10</sub>  | 0.90   | 0.900 [0.898, 0.901] |
| PM <sub>10</sub>  | 0.95   | 0.950 [0.949, 0.951] |
| PM <sub>2.5</sub> | 0.75   | 0.750 [0.749, 0.751] |
| PM <sub>2.5</sub> | 0.90   | 0.900 [0.899, 0.901] |
| PM <sub>2.5</sub> | 0.95   | 0.950 [0.949, 0.951] |

Metric computed station-wise and summarised across stations as median [min, max].

**Table 14** In-sample calibration check based on the  $p$  metric.

| Pollutant         | $\tau$ | $p$                                 |
|-------------------|--------|-------------------------------------|
| NO <sub>2</sub>   | 0.75   | 0.747 (0.702, 0.786) [0.647, 0.876] |
| NO <sub>2</sub>   | 0.90   | 0.905 (0.878, 0.916) [0.848, 0.963] |
| NO <sub>2</sub>   | 0.95   | 0.952 (0.937, 0.960) [0.919, 0.981] |
| PM <sub>10</sub>  | 0.75   | 0.748 (0.724, 0.792) [0.670, 0.804] |
| PM <sub>10</sub>  | 0.90   | 0.898 (0.883, 0.915) [0.862, 0.947] |
| PM <sub>10</sub>  | 0.95   | 0.950 (0.936, 0.958) [0.932, 0.980] |
| PM <sub>2.5</sub> | 0.75   | 0.759 (0.723, 0.777) [0.671, 0.821] |
| PM <sub>2.5</sub> | 0.90   | 0.904 (0.881, 0.921) [0.838, 0.941] |
| PM <sub>2.5</sub> | 0.95   | 0.952 (0.936, 0.965) [0.913, 0.977] |

Metric computed year-wise (2011–2022) and summarised across years as median (Q25, Q75) [min, max].

**Table 15** Residual temporal dependence diagnostics for  $\tau = 0.90$ .

| Pollutant         | lag1                 | lag7  |
|-------------------|----------------------|-------|
| NO <sub>2</sub>   | 0.400 [0.285, 0.593] | 0.172 |
| PM <sub>10</sub>  | 0.479 [0.379, 0.518] | 0.133 |
| PM <sub>2.5</sub> | 0.489 [0.458, 0.541] | 0.132 |

Median (and range for lag 1) across monitoring sites of the autocorrelation function (ACF) of the calibration indicator  $r_{t\ell}(\mathbf{s}) = \mathbb{I}\{y_{t\ell}(\mathbf{s}) \leq \hat{q}_{t\ell}^{\tau}(\mathbf{s})\} - \tau$ , evaluated at lags 1 and 7 days.

**Table 16** LOSO-CV summary for NO<sub>2</sub> at  $\tau = 0.75$ .

| Station | Station Type        | $\tau$ | $R^1$  | $R^1_{\text{train}}$ | WMAE   | $p$   |
|---------|---------------------|--------|--------|----------------------|--------|-------|
| CDG     | Background Rural    | 0.75   | -0.273 | 0.485                | 4.546  | 0.980 |
| CAV     | Background Suburban | 0.75   | 0.192  | 0.385                | 4.516  | 0.521 |
| MAL     | Background Suburban | 0.75   | 0.237  | 0.552                | 3.420  | 0.845 |
| PRE     | Background Urban    | 0.75   | 0.132  | 0.154                | 5.102  | 0.937 |
| VAD     | Background Urban    | 0.75   | -0.334 | -0.045               | 7.368  | 0.982 |
| BUF     | Background Urban    | 0.75   | 0.264  | 0.346                | 3.648  | 0.803 |
| CIP     | Background Urban    | 0.75   | 0.331  | 0.332                | 3.802  | 0.760 |
| ARE     | Background Urban    | 0.75   | 0.137  | 0.138                | 5.053  | 0.944 |
| CIN     | Background Urban    | 0.75   | 0.295  | 0.318                | 4.307  | 0.765 |
| FRA     | Traffic Urban       | 0.75   | -1.733 | -0.838               | 14.148 | 0.091 |
| FER     | Traffic Urban       | 0.75   | -0.645 | 0.051                | 9.319  | 0.247 |
| MGR     | Traffic Urban       | 0.75   | 0.081  | 0.340                | 5.831  | 0.451 |
| TIB     | Traffic Urban       | 0.75   | -0.179 | -0.059               | 7.243  | 0.357 |

WMAE is expressed in  $\mu\text{g}/\text{m}^3$ . Station codes: ARE = Arenula; BUF = Bufalotta; CAV = Cavaliere; CDG = Castel di Guido; CIN = Cinecitta; CIP = Cipro; FER = Fermi; FRA = Francia; MAL = Malagrotta; MGR = Magna Grecia; PRE = Preneste; TIB = Tiburtina; VAD = Villa Ada.

**Table 17** LOSO-CV summary for PM<sub>10</sub> at  $\tau = 0.75$ .

| Station | Station Type        | $\tau$ | $R^1$  | $R^1_{\text{train}}$ | WMAE  | $p$   |
|---------|---------------------|--------|--------|----------------------|-------|-------|
| CDG     | Background Rural    | 0.75   | -0.094 | 0.070                | 3.429 | 0.819 |
| CAV     | Background Suburban | 0.75   | 0.043  | 0.068                | 3.696 | 0.871 |
| MAL     | Background Suburban | 0.75   | 0.127  | 0.167                | 3.577 | 0.773 |
| VAD     | Background Urban    | 0.75   | 0.023  | 0.066                | 3.690 | 0.870 |
| BUF     | Background Urban    | 0.75   | 0.076  | 0.080                | 3.965 | 0.738 |
| CIP     | Background Urban    | 0.75   | 0.119  | 0.122                | 3.688 | 0.829 |
| ARE     | Background Urban    | 0.75   | 0.113  | 0.113                | 3.536 | 0.746 |
| CIN     | Background Urban    | 0.75   | 0.131  | 0.149                | 4.444 | 0.738 |
| FRA     | Traffic Urban       | 0.75   | -0.036 | -0.018               | 4.378 | 0.502 |
| FER     | Traffic Urban       | 0.75   | 0.105  | 0.151                | 3.611 | 0.626 |
| MGR     | Traffic Urban       | 0.75   | 0.174  | 0.178                | 3.549 | 0.775 |
| TIB     | Traffic Urban       | 0.75   | 0.054  | 0.125                | 4.902 | 0.575 |

WMAE is expressed in  $\mu\text{g}/\text{m}^3$ . Station codes: ARE = Arenula; BUF = Bufalotta; CAV = Cavaliere; CDG = Castel di Guido; CIN = Cinecitta; CIP = Cipro; FER = Fermi; FRA = Francia; MAL = Malagrotta; MGR = Magna Grecia; PRE = Preneste; TIB = Tiburtina; VAD = Villa Ada.

**Table 18** LOSO-CV summary for PM<sub>2.5</sub> at  $\tau = 0.75$ .

| Station | Station Type        | $\tau$ | $R^1$ | $R^1_{\text{train}}$ | WMAE  | $p$   |
|---------|---------------------|--------|-------|----------------------|-------|-------|
| CDG     | Background Rural    | 0.75   | 0.017 | 0.088                | 2.425 | 0.848 |
| CAV     | Background Suburban | 0.75   | 0.193 | 0.193                | 2.493 | 0.796 |
| MAL     | Background Suburban | 0.75   | 0.188 | 0.191                | 2.876 | 0.716 |
| VAD     | Background Urban    | 0.75   | 0.143 | 0.148                | 2.534 | 0.824 |
| CIP     | Background Urban    | 0.75   | 0.187 | 0.189                | 2.512 | 0.809 |
| ARE     | Background Urban    | 0.75   | 0.166 | 0.166                | 2.443 | 0.748 |
| CIN     | Background Urban    | 0.75   | 0.062 | 0.090                | 3.552 | 0.571 |
| FRA     | Traffic Urban       | 0.75   | 0.103 | 0.151                | 2.828 | 0.590 |

WMAE is expressed in  $\mu\text{g}/\text{m}^3$ . Station codes: ARE = Arenula; BUF = Bufalotta; CAV = Cavaliere; CDG = Castel di Guido; CIN = Cinecitta; CIP = Cipro; FER = Fermi; FRA = Francia; MAL = Malagrotta; MGR = Magna Grecia; PRE = Preneste; TIB = Tiburtina; VAD = Villa Ada.

**Table 19** LOSO-CV summary for NO<sub>2</sub> at  $\tau = 0.90$ .

| Station | Station Type        | $\tau$ | $R^1$  | $R^1_{\text{train}}$ | WMAE   | $p$   |
|---------|---------------------|--------|--------|----------------------|--------|-------|
| CDG     | Background Rural    | 0.9    | -0.154 | 0.466                | 2.490  | 0.995 |
| CAV     | Background Suburban | 0.9    | 0.253  | 0.361                | 2.747  | 0.759 |
| MAL     | Background Suburban | 0.9    | 0.255  | 0.528                | 1.987  | 0.944 |
| PRE     | Background Urban    | 0.9    | 0.146  | 0.188                | 2.813  | 0.985 |
| VAD     | Background Urban    | 0.9    | -0.130 | 0.093                | 3.755  | 0.993 |
| BUF     | Background Urban    | 0.9    | 0.251  | 0.382                | 2.079  | 0.932 |
| CIP     | Background Urban    | 0.9    | 0.324  | 0.333                | 2.122  | 0.921 |
| ARE     | Background Urban    | 0.9    | 0.156  | 0.164                | 2.812  | 0.986 |
| CIN     | Background Urban    | 0.9    | 0.286  | 0.315                | 2.525  | 0.894 |
| FRA     | Traffic Urban       | 0.9    | -2.962 | -2.151               | 11.482 | 0.217 |
| FER     | Traffic Urban       | 0.9    | -1.107 | -0.352               | 6.641  | 0.427 |
| MGR     | Traffic Urban       | 0.9    | 0.031  | 0.258                | 3.366  | 0.687 |
| TIB     | Traffic Urban       | 0.9    | -0.329 | -0.256               | 4.704  | 0.564 |

WMAE is expressed in  $\mu\text{g}/\text{m}^3$ . Station codes: ARE = Arenula; BUF = Bufalotta; CAV = Cavaliere; CDG = Castel di Guido; CIN = Cinecitta; CIP = Cipro; FER = Fermi; FRA = Francia; MAL = Malagrotta; MGR = Magna Grecia; PRE = Preneste; TIB = Tiburtina; VAD = Villa Ada.

**Table 20** LOSO-CV summary for PM<sub>10</sub> at  $\tau = 0.90$ .

| Station | Station Type        | $\tau$ | $R^1$  | $R^1_{\text{train}}$ | WMAE  | $p$   |
|---------|---------------------|--------|--------|----------------------|-------|-------|
| CDG     | Background Rural    | 0.9    | -0.073 | 0.113                | 2.130 | 0.931 |
| CAV     | Background Suburban | 0.9    | 0.042  | 0.065                | 2.365 | 0.957 |
| MAL     | Background Suburban | 0.9    | 0.170  | 0.185                | 2.244 | 0.900 |
| VAD     | Background Urban    | 0.9    | 0.076  | 0.109                | 2.225 | 0.956 |
| BUF     | Background Urban    | 0.9    | 0.091  | 0.092                | 2.432 | 0.887 |
| CIP     | Background Urban    | 0.9    | 0.170  | 0.171                | 2.173 | 0.933 |
| ARE     | Background Urban    | 0.9    | 0.152  | 0.156                | 2.118 | 0.895 |
| CIN     | Background Urban    | 0.9    | 0.169  | 0.196                | 2.784 | 0.876 |
| FRA     | Traffic Urban       | 0.9    | 0.004  | 0.015                | 2.692 | 0.738 |
| FER     | Traffic Urban       | 0.9    | 0.155  | 0.173                | 2.085 | 0.857 |
| MGR     | Traffic Urban       | 0.9    | 0.207  | 0.212                | 2.130 | 0.923 |
| TIB     | Traffic Urban       | 0.9    | 0.078  | 0.162                | 3.082 | 0.785 |

WMAE is expressed in  $\mu\text{g}/\text{m}^3$ . Station codes: ARE = Arenula; BUF = Bufalotta; CAV = Cavaliere; CDG = Castel di Guido; CIN = Cinecitta; CIP = Cipro; FER = Fermi; FRA = Francia; MAL = Malagrotta; MGR = Magna Grecia; PRE = Preneste; TIB = Tiburtina; VAD = Villa Ada.

**Table 21** LOSO-CV summary for PM<sub>2.5</sub> at  $\tau = 0.90$ .

| Station | Station Type        | $\tau$ | $R^1$ | $R^1_{\text{train}}$ | WMAE  | $p$   |
|---------|---------------------|--------|-------|----------------------|-------|-------|
| CDG     | Background Rural    | 0.9    | 0.098 | 0.182                | 1.461 | 0.954 |
| CAV     | Background Suburban | 0.9    | 0.243 | 0.243                | 1.486 | 0.931 |
| MAL     | Background Suburban | 0.9    | 0.252 | 0.256                | 1.824 | 0.861 |
| VAD     | Background Urban    | 0.9    | 0.229 | 0.232                | 1.466 | 0.935 |
| CIP     | Background Urban    | 0.9    | 0.260 | 0.260                | 1.438 | 0.936 |
| ARE     | Background Urban    | 0.9    | 0.235 | 0.236                | 1.403 | 0.895 |
| CIN     | Background Urban    | 0.9    | 0.123 | 0.152                | 2.309 | 0.751 |
| FRA     | Traffic Urban       | 0.9    | 0.170 | 0.182                | 1.635 | 0.790 |

WMAE is expressed in  $\mu\text{g}/\text{m}^3$ . Station codes: ARE = Arenula; BUF = Bufalotta; CAV = Cavaliere; CDG = Castel di Guido; CIN = Cinecitta; CIP = Cipro; FER = Fermi; FRA = Francia; MAL = Malagrotta; MGR = Magna Grecia; PRE = Preneste; TIB = Tiburtina; VAD = Villa Ada.

**Table 22** LOSO-CV summary for NO<sub>2</sub> at  $\tau = 0.95$ .

| Station | Station Type        | $\tau$ | $R^1$  | $R^1_{\text{train}}$ | WMAE  | $p$   |
|---------|---------------------|--------|--------|----------------------|-------|-------|
| CDG     | Background Rural    | 0.95   | -0.142 | 0.444                | 1.489 | 0.998 |
| CAV     | Background Suburban | 0.95   | 0.261  | 0.315                | 1.762 | 0.852 |
| MAL     | Background Suburban | 0.95   | 0.267  | 0.512                | 1.196 | 0.971 |
| PRE     | Background Urban    | 0.95   | 0.133  | 0.195                | 1.682 | 0.994 |
| VAD     | Background Urban    | 0.95   | -0.014 | 0.129                | 2.136 | 0.995 |
| BUF     | Background Urban    | 0.95   | 0.227  | 0.378                | 1.273 | 0.978 |
| CIP     | Background Urban    | 0.95   | 0.313  | 0.333                | 1.275 | 0.968 |
| ARE     | Background Urban    | 0.95   | 0.175  | 0.190                | 1.650 | 0.995 |
| CIN     | Background Urban    | 0.95   | 0.268  | 0.292                | 1.568 | 0.939 |
| FRA     | Traffic Urban       | 0.95   | -4.245 | -3.543               | 9.018 | 0.320 |
| FER     | Traffic Urban       | 0.95   | -1.367 | -0.618               | 4.461 | 0.577 |
| MGR     | Traffic Urban       | 0.95   | 0.003  | 0.209                | 2.035 | 0.812 |
| TIBU    | Traffic Urban       | 0.95   | -0.435 | -0.363               | 3.057 | 0.694 |

WMAE is expressed in  $\mu\text{g}/\text{m}^3$ . Station codes: ARE = Arenula; BUF = Bufalotta; CAV = Cavaliere; CDG = Castel di Guido; CIN = Cinecitta; CIP = Cipro; FER = Fermi; FRA = Francia; MAL = Malagrotta; MGR = Magna Grecia; PRE = Preneste; TIB = Tiburtina; VAD = Villa Ada.

**Table 23** LOSO-CV summary for PM<sub>10</sub> at  $\tau = 0.95$ .

| Station | Station Type        | $\tau$ | $R^1$  | $R^1_{\text{train}}$ | WMAE  | $p$   |
|---------|---------------------|--------|--------|----------------------|-------|-------|
| CDG     | Background Rural    | 0.95   | -0.054 | 0.146                | 1.346 | 0.969 |
| CAV     | Background Suburban | 0.95   | 0.035  | 0.063                | 1.516 | 0.983 |
| MAL     | Background Suburban | 0.95   | 0.168  | 0.172                | 1.436 | 0.939 |
| VAD     | Background Urban    | 0.95   | 0.093  | 0.115                | 1.373 | 0.980 |
| BUF     | Background Urban    | 0.95   | 0.073  | 0.073                | 1.555 | 0.945 |
| CIP     | Background Urban    | 0.95   | 0.169  | 0.170                | 1.342 | 0.963 |
| ARE     | Background Urban    | 0.95   | 0.151  | 0.155                | 1.334 | 0.952 |
| CIN     | Background Urban    | 0.95   | 0.153  | 0.205                | 1.813 | 0.928 |
| FRA     | Traffic Urban       | 0.95   | 0.018  | 0.023                | 1.681 | 0.852 |
| FER     | Traffic Urban       | 0.95   | 0.145  | 0.146                | 1.300 | 0.938 |
| MGR     | Traffic Urban       | 0.95   | 0.196  | 0.197                | 1.340 | 0.958 |
| TIB     | Traffic Urban       | 0.95   | 0.067  | 0.174                | 1.958 | 0.881 |

WMAE is expressed in  $\mu\text{g}/\text{m}^3$ . Station codes: ARE = Arenula; BUF = Bufalotta; CAV = Cavaliere; CDG = Castel di Guido; CIN = Cinecitta; CIP = Cipro; FER = Fermi; FRA = Francia; MAL = Malagrotta; MGR = Magna Grecia; PRE = Preneste; TIB = Tiburtina; VAD = Villa Ada.

**Table 24** LOSO-CV summary for  $\text{PM}_{2.5}$  at  $\tau = 0.95$ .

| Station | Station Type        | $\tau$ | $R^1$ | $R^1_{\text{train}}$ | WMAE  | $p$   |
|---------|---------------------|--------|-------|----------------------|-------|-------|
| CDG     | Background Rural    | 0.95   | 0.124 | 0.208                | 0.901 | 0.982 |
| CAV     | Background Suburban | 0.95   | 0.249 | 0.249                | 0.906 | 0.963 |
| MAL     | Background Suburban | 0.95   | 0.250 | 0.259                | 1.177 | 0.916 |
| VAD     | Background Urban    | 0.95   | 0.247 | 0.248                | 0.878 | 0.971 |
| CIP     | Background Urban    | 0.95   | 0.281 | 0.281                | 0.844 | 0.969 |
| ARE     | Background Urban    | 0.95   | 0.255 | 0.256                | 0.831 | 0.951 |
| CIN     | Background Urban    | 0.95   | 0.111 | 0.170                | 1.523 | 0.840 |
| FRA     | Traffic Urban       | 0.95   | 0.216 | 0.219                | 0.952 | 0.890 |

WMAE is expressed in  $\mu\text{g}/\text{m}^3$ . Station codes: ARE = Arenula; BUF = Bufalotta; CAV = Cavaliere; CDG = Castel di Guido; CIN = Cinecitta; CIP = Cipro; FER = Fermi; FRA = Francia; MAL = Malagrotta; MGR = Magna Grecia; PRE = Preneste; TIB = Tiburtina; VAD = Villa Ada.

**Table 25** LOYO-CV summary for  $\text{NO}_2$  at  $\tau = 0.75$ .

| Year | $\tau$ | $R^1$ | $R^1_{\text{train}}$ | WMAE  | $p$   |
|------|--------|-------|----------------------|-------|-------|
| 2011 | 0.75   | 0.350 | 0.516                | 5.174 | 0.656 |
| 2012 | 0.75   | 0.377 | 0.437                | 4.751 | 0.783 |
| 2013 | 0.75   | 0.336 | 0.374                | 4.611 | 0.774 |
| 2014 | 0.75   | 0.390 | 0.390                | 4.261 | 0.888 |
| 2015 | 0.75   | 0.431 | 0.441                | 3.896 | 0.750 |
| 2016 | 0.75   | 0.426 | 0.431                | 3.803 | 0.700 |
| 2017 | 0.75   | 0.392 | 0.398                | 4.114 | 0.630 |
| 2018 | 0.75   | 0.478 | 0.482                | 3.274 | 0.737 |
| 2019 | 0.75   | 0.379 | 0.404                | 3.524 | 0.673 |
| 2020 | 0.75   | 0.392 | 0.477                | 3.702 | 0.826 |
| 2021 | 0.75   | 0.390 | 0.523                | 3.157 | 0.821 |
| 2022 | 0.75   | 0.345 | 0.500                | 3.259 | 0.719 |

WMAE is expressed in  $\mu\text{g}/\text{m}^3$ .

**Table 26** LOYO-CV summary for  $\text{PM}_{10}$  at  $\tau = 0.75$ .

| Year | $\tau$ | $R^1$ | $R^1_{\text{train}}$ | WMAE  | $p$   |
|------|--------|-------|----------------------|-------|-------|
| 2011 | 0.75   | 0.159 | 0.227                | 4.125 | 0.692 |
| 2012 | 0.75   | 0.113 | 0.153                | 3.740 | 0.699 |
| 2013 | 0.75   | 0.152 | 0.153                | 3.871 | 0.806 |
| 2014 | 0.75   | 0.147 | 0.147                | 4.092 | 0.802 |
| 2015 | 0.75   | 0.138 | 0.156                | 4.274 | 0.665 |
| 2016 | 0.75   | 0.160 | 0.161                | 3.348 | 0.756 |
| 2017 | 0.75   | 0.125 | 0.137                | 3.237 | 0.807 |
| 2018 | 0.75   | 0.149 | 0.168                | 2.900 | 0.798 |
| 2019 | 0.75   | 0.052 | 0.079                | 3.568 | 0.757 |
| 2020 | 0.75   | 0.158 | 0.159                | 3.791 | 0.722 |
| 2021 | 0.75   | 0.027 | 0.064                | 3.776 | 0.737 |
| 2022 | 0.75   | 0.068 | 0.085                | 3.705 | 0.710 |

WMAE is expressed in  $\mu\text{g}/\text{m}^3$ .

**Table 27** LOYO-CV summary for  $\text{PM}_{2.5}$  at  $\tau = 0.75$ .

| Year | $\tau$ | $R^1$ | $R^1_{\text{train}}$ | WMAE  | $p$   |
|------|--------|-------|----------------------|-------|-------|
| 2011 | 0.75   | 0.185 | 0.321                | 3.248 | 0.706 |
| 2012 | 0.75   | 0.175 | 0.260                | 2.749 | 0.699 |
| 2013 | 0.75   | 0.154 | 0.155                | 3.231 | 0.780 |
| 2014 | 0.75   | 0.168 | 0.168                | 2.710 | 0.831 |
| 2015 | 0.75   | 0.166 | 0.214                | 3.314 | 0.661 |
| 2016 | 0.75   | 0.192 | 0.197                | 2.468 | 0.768 |
| 2017 | 0.75   | 0.140 | 0.149                | 2.301 | 0.795 |
| 2018 | 0.75   | 0.131 | 0.160                | 2.016 | 0.754 |
| 2019 | 0.75   | 0.000 | 0.069                | 2.232 | 0.762 |
| 2020 | 0.75   | 0.202 | 0.206                | 2.662 | 0.733 |
| 2021 | 0.75   | 0.050 | 0.138                | 2.193 | 0.788 |
| 2022 | 0.75   | 0.101 | 0.126                | 2.198 | 0.660 |

WMAE is expressed in  $\mu\text{g}/\text{m}^3$ .

**Table 28** LOYO-CV summary for NO<sub>2</sub> at  $\tau = 0.90$ .

| <b>Year</b> | $\tau$ | $R^1$ | $R^1_{\text{train}}$ | <b>WMAE</b> | $p$   |
|-------------|--------|-------|----------------------|-------------|-------|
| 2011        | 0.9    | 0.299 | 0.518                | 2.954       | 0.838 |
| 2012        | 0.9    | 0.340 | 0.407                | 2.730       | 0.914 |
| 2013        | 0.9    | 0.267 | 0.305                | 2.745       | 0.898 |
| 2014        | 0.9    | 0.342 | 0.342                | 2.497       | 0.965 |
| 2015        | 0.9    | 0.387 | 0.390                | 2.203       | 0.907 |
| 2016        | 0.9    | 0.375 | 0.375                | 2.207       | 0.879 |
| 2017        | 0.9    | 0.341 | 0.341                | 2.346       | 0.832 |
| 2018        | 0.9    | 0.446 | 0.468                | 1.829       | 0.909 |
| 2019        | 0.9    | 0.335 | 0.400                | 2.057       | 0.861 |
| 2020        | 0.9    | 0.399 | 0.474                | 2.035       | 0.927 |
| 2021        | 0.9    | 0.379 | 0.529                | 1.777       | 0.936 |
| 2022        | 0.9    | 0.309 | 0.504                | 1.865       | 0.869 |

WMAE is expressed in  $\mu\text{g}/\text{m}^3$ .

**Table 29** LOYO-CV summary for PM<sub>10</sub> at  $\tau = 0.90$ .

| <b>Year</b> | $\tau$ | $R^1$ | $R^1_{\text{train}}$ | <b>WMAE</b> | $p$   |
|-------------|--------|-------|----------------------|-------------|-------|
| 2011        | 0.9    | 0.214 | 0.264                | 2.489       | 0.870 |
| 2012        | 0.9    | 0.184 | 0.197                | 2.155       | 0.882 |
| 2013        | 0.9    | 0.210 | 0.214                | 2.352       | 0.915 |
| 2014        | 0.9    | 0.187 | 0.194                | 2.527       | 0.906 |
| 2015        | 0.9    | 0.208 | 0.243                | 2.372       | 0.854 |
| 2016        | 0.9    | 0.219 | 0.220                | 1.935       | 0.915 |
| 2017        | 0.9    | 0.136 | 0.158                | 1.997       | 0.928 |
| 2018        | 0.9    | 0.127 | 0.167                | 1.798       | 0.949 |
| 2019        | 0.9    | 0.042 | 0.064                | 2.327       | 0.908 |
| 2020        | 0.9    | 0.209 | 0.209                | 2.237       | 0.871 |
| 2021        | 0.9    | 0.011 | 0.045                | 2.487       | 0.880 |
| 2022        | 0.9    | 0.041 | 0.063                | 2.416       | 0.875 |

WMAE is expressed in  $\mu\text{g}/\text{m}^3$ .

**Table 30** LOYO-CV summary for PM<sub>2.5</sub> at  $\tau = 0.90$ .

| Year | $\tau$ | $R^1$ | $R^1_{\text{train}}$ | WMAE  | $p$   |
|------|--------|-------|----------------------|-------|-------|
| 2011 | 0.9    | 0.248 | 0.341                | 1.953 | 0.870 |
| 2012 | 0.9    | 0.238 | 0.283                | 1.581 | 0.902 |
| 2013 | 0.9    | 0.256 | 0.279                | 1.938 | 0.894 |
| 2014 | 0.9    | 0.261 | 0.263                | 1.555 | 0.935 |
| 2015 | 0.9    | 0.225 | 0.287                | 1.892 | 0.825 |
| 2016 | 0.9    | 0.290 | 0.290                | 1.404 | 0.920 |
| 2017 | 0.9    | 0.205 | 0.226                | 1.366 | 0.932 |
| 2018 | 0.9    | 0.201 | 0.235                | 1.178 | 0.943 |
| 2019 | 0.9    | 0.089 | 0.184                | 1.327 | 0.905 |
| 2020 | 0.9    | 0.265 | 0.267                | 1.540 | 0.864 |
| 2021 | 0.9    | 0.100 | 0.195                | 1.351 | 0.910 |
| 2022 | 0.9    | 0.118 | 0.172                | 1.325 | 0.851 |

WMAE is expressed in  $\mu\text{g}/\text{m}^3$ .

**Table 31** LOYO-CV summary for NO<sub>2</sub> at  $\tau = 0.95$ .

| Year | $\tau$ | $R^1$ | $R^1_{\text{train}}$ | WMAE  | $p$   |
|------|--------|-------|----------------------|-------|-------|
| 2011 | 0.95   | 0.275 | 0.533                | 1.737 | 0.914 |
| 2012 | 0.95   | 0.321 | 0.392                | 1.643 | 0.961 |
| 2013 | 0.95   | 0.219 | 0.245                | 1.705 | 0.942 |
| 2014 | 0.95   | 0.315 | 0.315                | 1.504 | 0.982 |
| 2015 | 0.95   | 0.360 | 0.360                | 1.311 | 0.956 |
| 2016 | 0.95   | 0.341 | 0.342                | 1.345 | 0.940 |
| 2017 | 0.95   | 0.287 | 0.288                | 1.449 | 0.911 |
| 2018 | 0.95   | 0.413 | 0.453                | 1.113 | 0.963 |
| 2019 | 0.95   | 0.294 | 0.379                | 1.283 | 0.928 |
| 2020 | 0.95   | 0.382 | 0.466                | 1.205 | 0.957 |
| 2021 | 0.95   | 0.362 | 0.522                | 1.065 | 0.972 |
| 2022 | 0.95   | 0.282 | 0.493                | 1.129 | 0.928 |

WMAE is expressed in  $\mu\text{g}/\text{m}^3$ .

**Table 32** LOYO-CV summary for PM<sub>10</sub> at  $\tau = 0.95$ .

| Year | $\tau$ | $R^1$  | $R_{\text{train}}^1$ | WMAE  | $p$   |
|------|--------|--------|----------------------|-------|-------|
| 2011 | 0.95   | 0.210  | 0.273                | 1.601 | 0.920 |
| 2012 | 0.95   | 0.214  | 0.217                | 1.295 | 0.950 |
| 2013 | 0.95   | 0.211  | 0.220                | 1.483 | 0.953 |
| 2014 | 0.95   | 0.177  | 0.184                | 1.632 | 0.950 |
| 2015 | 0.95   | 0.189  | 0.226                | 1.491 | 0.922 |
| 2016 | 0.95   | 0.204  | 0.205                | 1.190 | 0.966 |
| 2017 | 0.95   | 0.135  | 0.160                | 1.260 | 0.963 |
| 2018 | 0.95   | 0.082  | 0.168                | 1.175 | 0.981 |
| 2019 | 0.95   | -0.003 | 0.021                | 1.559 | 0.949 |
| 2020 | 0.95   | 0.213  | 0.214                | 1.338 | 0.947 |
| 2021 | 0.95   | -0.011 | 0.020                | 1.662 | 0.931 |
| 2022 | 0.95   | 0.017  | 0.033                | 1.602 | 0.926 |

WMAE is expressed in  $\mu\text{g}/\text{m}^3$ .

**Table 33** LOYO-CV summary for PM<sub>2.5</sub> at  $\tau = 0.95$ .

| Year | $\tau$ | $R^1$ | $R_{\text{train}}^1$ | WMAE  | $p$   |
|------|--------|-------|----------------------|-------|-------|
| 2011 | 0.95   | 0.261 | 0.365                | 1.188 | 0.922 |
| 2012 | 0.95   | 0.260 | 0.273                | 0.953 | 0.952 |
| 2013 | 0.95   | 0.266 | 0.308                | 1.179 | 0.935 |
| 2014 | 0.95   | 0.266 | 0.271                | 0.920 | 0.975 |
| 2015 | 0.95   | 0.229 | 0.297                | 1.125 | 0.904 |
| 2016 | 0.95   | 0.303 | 0.304                | 0.833 | 0.963 |
| 2017 | 0.95   | 0.231 | 0.258                | 0.834 | 0.968 |
| 2018 | 0.95   | 0.187 | 0.274                | 0.735 | 0.980 |
| 2019 | 0.95   | 0.144 | 0.238                | 0.806 | 0.954 |
| 2020 | 0.95   | 0.296 | 0.296                | 0.885 | 0.925 |
| 2021 | 0.95   | 0.112 | 0.225                | 0.851 | 0.949 |
| 2022 | 0.95   | 0.106 | 0.195                | 0.842 | 0.921 |

WMAE is expressed in  $\mu\text{g}/\text{m}^3$ .

**Table 34** FF-LOYO-CV summary for NO<sub>2</sub> at  $\tau = 0.75$ .

| Year | $\tau$ | $R^1$ | $R_{\text{train}}^1$ | WMAE  | $p$   |
|------|--------|-------|----------------------|-------|-------|
| 2019 | 0.75   | 0.385 | 0.456                | 3.497 | 0.721 |
| 2020 | 0.75   | 0.372 | 0.488                | 3.848 | 0.855 |
| 2021 | 0.75   | 0.385 | 0.536                | 3.192 | 0.821 |
| 2022 | 0.75   | 0.345 | 0.500                | 3.259 | 0.719 |

WMAE is expressed in  $\mu\text{g}/\text{m}^3$ .

**Table 35** FF-LOYO-CV summary for PM<sub>10</sub> at  $\tau = 0.75$ .

| Year | $\tau$ | $R^1$ | $R^1_{\text{train}}$ | WMAE  | $p$   |
|------|--------|-------|----------------------|-------|-------|
| 2019 | 0.75   | 0.041 | 0.068                | 3.595 | 0.721 |
| 2020 | 0.75   | 0.149 | 0.153                | 3.837 | 0.689 |
| 2021 | 0.75   | 0.015 | 0.053                | 3.818 | 0.719 |
| 2022 | 0.75   | 0.068 | 0.085                | 3.705 | 0.710 |

WMAE is expressed in  $\mu\text{g}/\text{m}^3$ .

**Table 36** FF-LOYO-CV summary for PM<sub>2.5</sub> at  $\tau = 0.75$ .

| Year | $\tau$ | $R^1$  | $R^1_{\text{train}}$ | WMAE  | $p$   |
|------|--------|--------|----------------------|-------|-------|
| 2019 | 0.75   | -0.004 | 0.100                | 2.227 | 0.738 |
| 2020 | 0.75   | 0.199  | 0.203                | 2.680 | 0.717 |
| 2021 | 0.75   | 0.0504 | 0.138                | 2.190 | 0.764 |
| 2022 | 0.75   | 0.102  | 0.127                | 2.201 | 0.662 |

WMAE is expressed in  $\mu\text{g}/\text{m}^3$ .

**Table 37** FF-LOYO-CV summary for NO<sub>2</sub> at  $\tau = 0.90$ .

| Year | $\tau$ | $R^1$ | $R^1_{\text{train}}$ | WMAE  | $p$   |
|------|--------|-------|----------------------|-------|-------|
| 2019 | 0.9    | 0.328 | 0.430                | 2.077 | 0.877 |
| 2020 | 0.9    | 0.388 | 0.484                | 2.079 | 0.934 |
| 2021 | 0.9    | 0.377 | 0.537                | 1.784 | 0.931 |
| 2022 | 0.9    | 0.309 | 0.504                | 1.865 | 0.869 |

WMAE is expressed in  $\mu\text{g}/\text{m}^3$ .

**Table 38** FF-LOYO-CV summary for PM<sub>10</sub> at  $\tau = 0.90$ .

| Year | $\tau$ | $R^1$  | $R^1_{\text{train}}$ | WMAE  | $p$   |
|------|--------|--------|----------------------|-------|-------|
| 2019 | 0.9    | 0.019  | 0.051                | 2.353 | 0.862 |
| 2020 | 0.9    | 0.188  | 0.189                | 2.313 | 0.842 |
| 2021 | 0.9    | -0.007 | 0.027                | 2.527 | 0.863 |
| 2022 | 0.9    | 0.041  | 0.063                | 2.416 | 0.875 |

WMAE is expressed in  $\mu\text{g}/\text{m}^3$ .

**Table 39** FF-LOYO-CV summary for  $\text{PM}_{2.5}$  at  $\tau = 0.90$ .

| Year | $\tau$ | $R^1$ | $R^1_{\text{train}}$ | WMAE  | $p$   |
|------|--------|-------|----------------------|-------|-------|
| 2019 | 0.9    | 0.064 | 0.198                | 1.344 | 0.856 |
| 2020 | 0.9    | 0.248 | 0.254                | 1.594 | 0.845 |
| 2021 | 0.9    | 0.097 | 0.210                | 1.353 | 0.898 |
| 2022 | 0.9    | 0.118 | 0.172                | 1.325 | 0.851 |

WMAE is expressed in  $\mu\text{g}/\text{m}^3$ .

**Table 40** FF-LOYO-CV summary for  $\text{NO}_2$  at  $\tau = 0.95$ .

| Year | $\tau$ | $R^1$ | $R^1_{\text{train}}$ | WMAE  | $p$   |
|------|--------|-------|----------------------|-------|-------|
| 2019 | 0.95   | 0.280 | 0.399                | 1.306 | 0.926 |
| 2020 | 0.95   | 0.371 | 0.473                | 1.230 | 0.962 |
| 2021 | 0.95   | 0.358 | 0.527                | 1.074 | 0.969 |
| 2022 | 0.95   | 0.282 | 0.493                | 1.129 | 0.927 |

WMAE is expressed in  $\mu\text{g}/\text{m}^3$ .

**Table 41** FF-LOYO-CV summary for  $\text{PM}_{10}$  at  $\tau = 0.95$ .

| Year | $\tau$ | $R^1$  | $R^1_{\text{train}}$ | WMAE  | $p$   |
|------|--------|--------|----------------------|-------|-------|
| 2019 | 0.95   | -0.054 | -0.019               | 1.608 | 0.919 |
| 2020 | 0.95   | 0.185  | 0.185                | 1.416 | 0.913 |
| 2021 | 0.95   | -0.050 | -0.008               | 1.716 | 0.917 |
| 2022 | 0.95   | 0.017  | 0.033                | 1.602 | 0.926 |

WMAE is expressed in  $\mu\text{g}/\text{m}^3$ .

**Table 42** FF-LOYO-CV summary for  $\text{PM}_{2.5}$  at  $\tau = 0.95$ .

| Year | $\tau$ | $R^1$ | $R^1_{\text{train}}$ | WMAE  | $p$   |
|------|--------|-------|----------------------|-------|-------|
| 2019 | 0.95   | 0.106 | 0.233                | 0.823 | 0.918 |
| 2020 | 0.95   | 0.261 | 0.262                | 0.961 | 0.900 |
| 2021 | 0.95   | 0.104 | 0.231                | 0.858 | 0.940 |
| 2022 | 0.95   | 0.106 | 0.195                | 0.842 | 0.922 |

WMAE is expressed in  $\mu\text{g}/\text{m}^3$ .

**Table 43** Estimated 95% credible intervals for spatial fixed effects in the spatial random process ( $\tau = 0.90$ )

| Pollutant         | Parameter                    | Median  | 2.5%   | 97.5% |
|-------------------|------------------------------|---------|--------|-------|
| NO <sub>2</sub>   | Imperviousness Surface Areas | 0.209   | -0.058 | 0.452 |
| PM <sub>10</sub>  | Population                   | 0.0056  | -0.016 | 0.028 |
| PM <sub>2.5</sub> | Population                   | 0.00096 | -0.023 | 0.026 |

Responses were transformed (square-root for NO<sub>2</sub>;  $\log(1 + x)$  for PMs) while covariates were expressed in their original scales.

**Table 44** Fixed-effect posterior summaries for NO<sub>2</sub> at  $\tau = 0.75$ , reported as posterior median (2.5%, 97.5%).

| Covariate                     | Median (2.5%, 97.5%)                                                       |
|-------------------------------|----------------------------------------------------------------------------|
| Daily seasonality (sin.)      | 0.044 (0.029, 0.060)                                                       |
| Daily seasonality (cos.)      | 0.851 (0.831, 0.872)                                                       |
| Year                          | -0.175 (-0.177, -0.172)                                                    |
| Weekend/holiday               | -0.514 (-0.530, -0.498)                                                    |
| 2m Dewpoint temperature       | $-9.90 \times 10^{-3}$ ( $-1.29 \times 10^{-2}$ , $-7.04 \times 10^{-3}$ ) |
| Total precipitation           | $-2.00 \times 10^{-4}$ ( $-2.90 \times 10^{-4}$ , $-1.04 \times 10^{-4}$ ) |
| Surface pressure              | $2.07 \times 10^{-3}$ ( $1.60 \times 10^{-3}$ , $2.54 \times 10^{-3}$ )    |
| Boundary layer height (12:00) | $-6.60 \times 10^{-5}$ ( $-1.01 \times 10^{-4}$ , $-3.23 \times 10^{-5}$ ) |
| Wind speed                    | $-2.26 \times 10^{-2}$ ( $-3.11 \times 10^{-2}$ , $-1.42 \times 10^{-2}$ ) |
| 2m Temperature (lag 1)        | $-5.26 \times 10^{-3}$ ( $-7.40 \times 10^{-3}$ , $-3.12 \times 10^{-3}$ ) |
| Imperviousness surface areas  | 0.224 (-0.048, 0.457)                                                      |

**Table 45** Fixed-effect posterior summaries for PM<sub>10</sub> at  $\tau = 0.75$ , reported as posterior median (2.5%, 97.5%).

| Covariate                     | Median (2.5%, 97.5%)                                                       |
|-------------------------------|----------------------------------------------------------------------------|
| Daily seasonality (sin.)      | 0.050 (0.044, 0.056)                                                       |
| Daily seasonality (cos.)      | 0.259 (0.251, 0.268)                                                       |
| Year                          | -0.022 (-0.023, -0.021)                                                    |
| Weekend/holiday               | -0.058 (-0.064, -0.052)                                                    |
| 2m Dewpoint temperature       | $-3.94 \times 10^{-3}$ ( $-5.14 \times 10^{-3}$ , $-2.77 \times 10^{-3}$ ) |
| Total precipitation           | $-1.78 \times 10^{-4}$ ( $-2.17 \times 10^{-4}$ , $-1.37 \times 10^{-4}$ ) |
| Surface pressure              | $4.09 \times 10^{-4}$ ( $2.18 \times 10^{-4}$ , $6.01 \times 10^{-4}$ )    |
| Boundary layer height (12:00) | $-7.16 \times 10^{-5}$ ( $-8.42 \times 10^{-5}$ , $-5.86 \times 10^{-5}$ ) |
| Wind speed                    | $-7.86 \times 10^{-3}$ ( $-1.11 \times 10^{-2}$ , $-4.39 \times 10^{-3}$ ) |
| 2m Temperature (lag 1)        | $4.97 \times 10^{-3}$ ( $4.15 \times 10^{-3}$ , $5.75 \times 10^{-3}$ )    |
| Population                    | 0.006 (-0.016, 0.029)                                                      |

**Table 46** Fixed-effect posterior summaries for PM<sub>2.5</sub> at  $\tau = 0.75$ , reported as posterior median (2.5%, 97.5%).

| Covariate                     | Median (2.5%, 97.5%)                                                       |
|-------------------------------|----------------------------------------------------------------------------|
| Daily seasonality (sin.)      | 0.054 (0.044, 0.063)                                                       |
| Daily seasonality (cos.)      | 0.361 (0.349, 0.373)                                                       |
| Year                          | -0.037 (-0.038, -0.036)                                                    |
| Weekend/holiday               | -0.010 (-0.019, -0.002)                                                    |
| 2m Dewpoint temperature       | $-8.00 \times 10^{-3}$ ( $-9.00 \times 10^{-3}$ , $-6.00 \times 10^{-3}$ ) |
| Total precipitation           | $-2.58 \times 10^{-4}$ ( $-3.14 \times 10^{-4}$ , $-1.92 \times 10^{-4}$ ) |
| Surface pressure              | $8.95 \times 10^{-4}$ ( $6.19 \times 10^{-4}$ , $1.00 \times 10^{-3}$ )    |
| Boundary layer height (12:00) | $-6.25 \times 10^{-5}$ ( $-8.13 \times 10^{-5}$ , $-4.44 \times 10^{-5}$ ) |
| Wind speed                    | -0.019 (-0.024, -0.014)                                                    |
| 2m Temperature (lag 1)        | 0.007 (0.006, 0.008)                                                       |
| Population                    | $-1.77 \times 10^{-4}$ (-0.030, 0.034)                                     |

**Table 47** Fixed-effect posterior summaries for NO<sub>2</sub> at  $\tau = 0.90$ , reported as posterior median (2.5%, 97.5%).

| Covariate                     | Median (2.5%, 97.5%)                                                       |
|-------------------------------|----------------------------------------------------------------------------|
| Daily seasonality (sin.)      | 0.072 (0.058, 0.086)                                                       |
| Daily seasonality (cos.)      | 0.897 (0.879, 0.915)                                                       |
| Year                          | -0.189 (-0.192, -0.187)                                                    |
| Weekend/holiday               | -0.485 (-0.501, -0.468)                                                    |
| 2m Dewpoint temperature       | -0.015 (-0.017, -0.013)                                                    |
| Total precipitation           | $-1.23 \times 10^{-4}$ ( $-2.12 \times 10^{-4}$ , $-4.07 \times 10^{-5}$ ) |
| Boundary layer height (00:00) | $-6.30 \times 10^{-5}$ ( $-8.77 \times 10^{-5}$ , $-3.75 \times 10^{-5}$ ) |
| Wind speed                    | -0.029 (-0.037, -0.021)                                                    |
| Surface pressure              | 0.002 (0.002, 0.002)                                                       |
| Boundary layer height (lag 1) | $6.01 \times 10^{-5}$ ( $2.79 \times 10^{-5}$ , $9.60 \times 10^{-5}$ )    |
| Imperviousness surface areas  | 0.217 (-0.058, 0.452)                                                      |

**Table 48** Fixed-effect posterior summaries for PM<sub>10</sub> at  $\tau = 0.90$ , reported as posterior median (2.5%, 97.5%).

| Covariate                     | Median (2.5%, 97.5%)                                                       |
|-------------------------------|----------------------------------------------------------------------------|
| Daily seasonality (sin.)      | 0.051 (0.044, 0.057)                                                       |
| Daily seasonality (cos.)      | 0.279 (0.271, 0.287)                                                       |
| Year                          | -0.018 (-0.019, -0.017)                                                    |
| Weekend/holiday               | -0.045 (-0.051, -0.039)                                                    |
| 2m Dewpoint temperature       | -0.001 (-0.002, $-3.86 \times 10^{-4}$ )                                   |
| Total precipitation           | $-2.17 \times 10^{-4}$ ( $-2.48 \times 10^{-4}$ , $-1.76 \times 10^{-4}$ ) |
| Surface pressure              | $2.23 \times 10^{-4}$ ( $3.79 \times 10^{-5}$ , $4.04 \times 10^{-4}$ )    |
| Boundary layer height (12:00) | $-9.49 \times 10^{-5}$ ( $-1.08 \times 10^{-4}$ , $-8.05 \times 10^{-5}$ ) |
| 2m Temperature (lag 1)        | 0.001 ( $5.73 \times 10^{-4}$ , 0.002)                                     |
| Population                    | 0.005 (-0.016, 0.029)                                                      |

**Table 49** Fixed-effect posterior summaries for PM<sub>2.5</sub> at  $\tau = 0.90$ , reported as posterior median (2.5%, 97.5%).

| Covariate                     | Median (2.5%, 97.5%)                                                       |
|-------------------------------|----------------------------------------------------------------------------|
| Daily seasonality (sin.)      | 0.063 (0.054, 0.072)                                                       |
| Daily seasonality (cos.)      | 0.424 (0.414, 0.434)                                                       |
| Year                          | -0.036 (-0.038, -0.035)                                                    |
| Weekend/holiday               | -0.005 (-0.014, 0.004)                                                     |
| 2m Dewpoint temperature       | -0.007 (-0.008, -0.005)                                                    |
| Total precipitation           | $-2.40 \times 10^{-4}$ ( $-2.88 \times 10^{-4}$ , $-1.92 \times 10^{-4}$ ) |
| Surface pressure              | $5.62 \times 10^{-4}$ ( $2.86 \times 10^{-4}$ , $8.20 \times 10^{-4}$ )    |
| Boundary layer height (00:00) | $-4.50 \times 10^{-5}$ ( $-5.83 \times 10^{-5}$ , $-3.15 \times 10^{-5}$ ) |
| Wind speed                    | -0.016 (-0.020, -0.011)                                                    |
| 2m Temperature (lag 1)        | 0.007 (0.006, 0.008)                                                       |
| Boundary layer height (lag 1) | $1.17 \times 10^{-5}$ ( $-7.34 \times 10^{-6}$ , $3.12 \times 10^{-5}$ )   |
| Population                    | $4.74 \times 10^{-4}$ (-0.031, 0.030)                                      |

**Table 50** Fixed-effect posterior summaries for NO<sub>2</sub> at  $\tau = 0.95$ , reported as posterior median (2.5%, 97.5%).

| Covariate                     | Median (2.5%, 97.5%)                                                       |
|-------------------------------|----------------------------------------------------------------------------|
| Daily seasonality (sin.)      | 0.102 (0.087, 0.116)                                                       |
| Daily seasonality (cos.)      | 0.891 (0.873, 0.910)                                                       |
| Year                          | -0.199 (-0.201, -0.197)                                                    |
| Weekend/holiday               | -0.464 (-0.480, -0.448)                                                    |
| 2m Dewpoint temperature       | $-1.44 \times 10^{-2}$ ( $-1.68 \times 10^{-2}$ , $-1.20 \times 10^{-2}$ ) |
| Total precipitation           | $-8.74 \times 10^{-5}$ ( $-1.72 \times 10^{-4}$ , $7.88 \times 10^{-6}$ )  |
| Boundary layer height (00:00) | $-9.63 \times 10^{-5}$ ( $-1.21 \times 10^{-4}$ , $-6.84 \times 10^{-5}$ ) |
| Wind speed                    | $-2.20 \times 10^{-2}$ ( $-2.98 \times 10^{-2}$ , $-1.45 \times 10^{-2}$ ) |
| Surface pressure (lag 1)      | $1.67 \times 10^{-3}$ ( $1.25 \times 10^{-3}$ , $2.11 \times 10^{-3}$ )    |
| Boundary layer height (lag 1) | $1.05 \times 10^{-4}$ ( $7.05 \times 10^{-5}$ , $1.39 \times 10^{-4}$ )    |
| Imperviousness surface areas  | 0.218 (-0.047, 0.438)                                                      |

**Table 51** Fixed-effect posterior summaries for PM<sub>10</sub> at  $\tau = 0.95$ , reported as posterior median (2.5%, 97.5%).

| Covariate                     | Median (2.5%, 97.5%)                                                       |
|-------------------------------|----------------------------------------------------------------------------|
| Daily seasonality (sin.)      | 0.051 (0.044, 0.057)                                                       |
| Daily seasonality (cos.)      | 0.279 (0.271, 0.287)                                                       |
| Year                          | -0.018 (-0.019, -0.017)                                                    |
| Weekend/holiday               | -0.045 (-0.051, -0.039)                                                    |
| 2m Dewpoint temperature       | $-1.43 \times 10^{-3}$ ( $-2.49 \times 10^{-3}$ , $-3.86 \times 10^{-4}$ ) |
| Total precipitation           | $-2.17 \times 10^{-4}$ ( $-2.48 \times 10^{-4}$ , $-1.76 \times 10^{-4}$ ) |
| Surface pressure              | $2.23 \times 10^{-4}$ ( $3.79 \times 10^{-5}$ , $4.04 \times 10^{-4}$ )    |
| Boundary layer height (12:00) | $-9.49 \times 10^{-5}$ ( $-1.08 \times 10^{-4}$ , $-8.05 \times 10^{-5}$ ) |
| 2m Temperature (lag 1)        | $1.38 \times 10^{-3}$ ( $5.73 \times 10^{-4}$ , $2.22 \times 10^{-3}$ )    |
| Population                    | 0.005 (-0.016, 0.029)                                                      |

**Table 52** Fixed-effect posterior summaries for  $\text{PM}_{2.5}$  at  $\tau = 0.95$ , reported as posterior median (2.5%, 97.5%).

| Covariate                     | Median (2.5%, 97.5%)                                                       |
|-------------------------------|----------------------------------------------------------------------------|
| Daily seasonality (sin.)      | 0.069 (0.060, 0.078)                                                       |
| Daily seasonality (cos.)      | 0.427 (0.416, 0.437)                                                       |
| Year                          | -0.036 (-0.037, -0.035)                                                    |
| Weekend/holiday               | $-5.48 \times 10^{-3}$ ( $-1.33 \times 10^{-2}$ , $2.34 \times 10^{-3}$ )  |
| 2m Dewpoint temperature       | $-6.17 \times 10^{-3}$ ( $-7.39 \times 10^{-3}$ , $-4.94 \times 10^{-3}$ ) |
| Total precipitation           | $-2.64 \times 10^{-4}$ ( $-3.04 \times 10^{-4}$ , $-2.27 \times 10^{-4}$ ) |
| Surface pressure              | $5.82 \times 10^{-4}$ ( $3.78 \times 10^{-4}$ , $7.87 \times 10^{-4}$ )    |
| Boundary layer height (00:00) | $-5.26 \times 10^{-5}$ ( $-6.50 \times 10^{-5}$ , $-3.99 \times 10^{-5}$ ) |
| 2m Temperature (lag 1)        | $5.52 \times 10^{-3}$ ( $4.57 \times 10^{-3}$ , $6.52 \times 10^{-3}$ )    |
| Boundary layer height (lag 1) | $2.07 \times 10^{-5}$ ( $4.40 \times 10^{-6}$ , $3.73 \times 10^{-5}$ )    |
| Population                    | 0.002 (-0.026, 0.032)                                                      |

## 8 Additional results for exposure surfaces

### 8.1 Relationships between analysed quantile levels

To assess whether focusing on  $\tau = 0.90$  is representative, we computed Pearson correlations between posterior mean GP-intercept surfaces across quantile levels (Table 53 and 54). Both the posterior mean GP-intercept surfaces and the annual-average posterior mean quantile surfaces are highly similar across  $\tau$ , with correlations very close to 1 for  $\text{NO}_2$  and  $\geq 0.96$  for  $\text{PM}_{10}$ . For  $\text{PM}_{2.5}$ , correlations remain high but are lower for the (0.75, 0.95) pair.

**Table 53** Pearson correlations between posterior mean GP-intercept surfaces across quantile levels.

| Pollutant         | corr(0.75, 0.90) | corr(0.90, 0.95) | corr(0.75, 0.95) |
|-------------------|------------------|------------------|------------------|
| $\text{NO}_2$     | 0.999            | 1.000            | 0.999            |
| $\text{PM}_{10}$  | 0.988            | 0.986            | 0.961            |
| $\text{PM}_{2.5}$ | 0.932            | 0.976            | 0.848            |

Metrics computed over the 1 km grid cells ( $n = 1292$ ).

#### 8.1.1 Quantile crossing

We assessed quantile crossing on the prediction grid by checking, for each day (2011–2022) and each of the 1292 cells, whether the posterior mean surfaces satisfied  $\hat{q}_{t\ell}^{0.75}(\mathbf{s}) \leq \hat{q}_{t\ell}^{0.90}(\mathbf{s}) \leq \hat{q}_{t\ell}^{0.95}(\mathbf{s})$ ,  $\forall \mathbf{s}, t, \ell$ . As expected, since considered levels are quite distant, no crossings were observed for any pollutant (0 violations across all grid-day combinations).

**Table 54** Pearson correlations between annual-average posterior mean  $\tau$ -quantile surfaces across quantile levels.

| Year | Pollutant         | corr(0.75, 0.90) | corr(0.90, 0.95) | corr(0.75, 0.95) |
|------|-------------------|------------------|------------------|------------------|
| 2011 | NO <sub>2</sub>   | 1.000            | 1.000            | 1.000            |
| 2011 | PM <sub>10</sub>  | 1.000            | 1.000            | 1.000            |
| 2011 | PM <sub>2.5</sub> | 0.944            | 0.980            | 0.873            |
| 2022 | NO <sub>2</sub>   | 1.000            | 1.000            | 1.000            |
| 2022 | PM <sub>10</sub>  | 1.000            | 1.000            | 1.000            |
| 2022 | PM <sub>2.5</sub> | 0.968            | 0.987            | 0.924            |

Metrics computed over the 1 km grid cells ( $n = 1292$ ) in 2011 and 2022.

## 8.2 Observed-predicted agreement ( $\tau = 0.90$ )

Figure 6 and Table 55 provide a diagnostic for  $\tau = 0.90$ , comparing each station by observed and predicted quantiles. Specifically, for each pollutant and year (2011, 2022), we compare (i) the observed empirical annual quantile of level  $\tau = 0.90$  of daily mean concentrations at each station,  $q_{\text{obs}}^{0.90}$ , with (ii) an annual summary of the model output,  $\hat{q}_{\text{pred}}^{0.90}$ , obtained as the empirical annual 90-th quantile of the day-specific conditional  $\tau = 0.90$  estimates evaluated at the corresponding station grid cell. While these two quantities are not identical estimands, their comparison is intended as a qualitative calibration check to assess whether observed stations empirical upper-tail behaviours are in accordance with the fitted quantile models.

For NO<sub>2</sub>, the scatter indicates a strong concordance in both years, with a slight tendency to overpredict the annual upper-tail level, more evident in 2011 and particularly for traffic sites. For PM<sub>10</sub>, station concordance seems preserved, but the comparison suggests an overestimation of the annual  $\tau = 0.90$  quantile (especially in 2011). Lastly, for PM<sub>2.5</sub>, agreement is weaker probably due to the sparse monitoring network, and the diagnostic highlights a clear positive overestimation in 2011 (and a smaller one in 2022). Table 55 summarises these patterns by reporting the median and range (min–max) of  $q_{\text{pred}} - q_{\text{obs}}$  across sites for each pollutant and year, confirming an overall positive bias under the adopted annual aggregation.

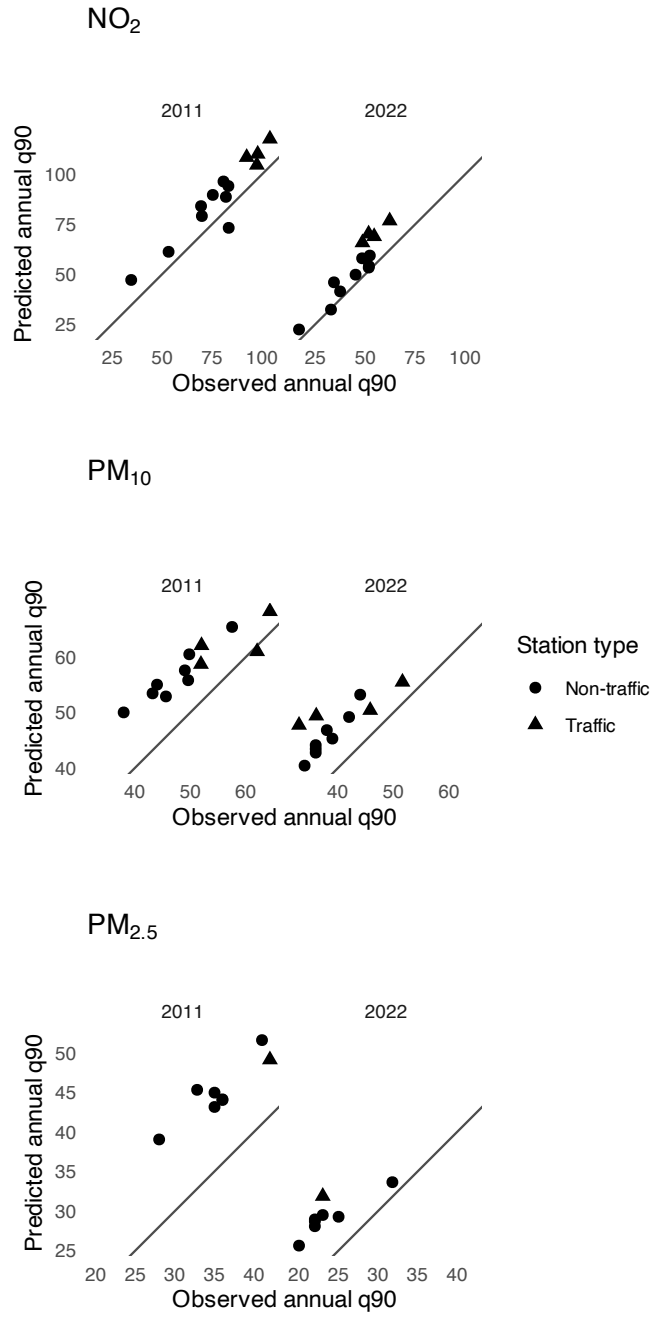

**Fig. 6** Observed vs predicted annual quantiles for  $\tau = 0.90$  in  $\mu g/m^3$ . The x-axis reports the empirical annual quantile of level  $\tau = 0.90$  of daily mean concentrations, the y-axis reports the empirical annual 90-th quantile of the daily conditional  $\tau = 0.90$  estimates evaluated at the corresponding station grid cell. Shape is given by recoded station type.

**Table 55** Summary of differences between predicted and observed annual summaries for  $\tau = 0.90$ .

| Pollutant         | Year | Bias [min, max]     |
|-------------------|------|---------------------|
| NO <sub>2</sub>   | 2011 | 12.4 [-10.1, 16.2]  |
| NO <sub>2</sub>   | 2022 | 7.10 [-0.519, 18.6] |
| PM <sub>10</sub>  | 2011 | 8.22 [-1.04, 12.0]  |
| PM <sub>10</sub>  | 2022 | 7.31 [3.87, 14.7]   |
| PM <sub>2.5</sub> | 2011 | 9.05 [7.11, 12.5]   |
| PM <sub>2.5</sub> | 2022 | 6.28 [1.83, 8.86]   |

Median and range [min, max] of  $\hat{q}_{\text{pred}}^{0.90} - q_{\text{obs}}^{0.90}$  computed across monitoring sites, where  $q_{\text{obs}}^{0.90}$  is the empirical annual quantile of level  $\tau = 0.90$  of daily mean concentrations and  $\hat{q}_{\text{pred}}^{0.90}$  is the annual 90-th quantile of the predicted daily conditional quantile of level  $\tau = 0.90$  estimates at station locations.

## 9 PM<sub>2.5</sub> augmentation sensitivity

PM<sub>2.5</sub> and PM<sub>10</sub> were strongly correlated in our dataset (Pearson’s  $r = 0.86$ ). Following established literature (e.g., [Stafoggia et al. \(2019, 2020\)](#)) and given the scarcity of PM<sub>2.5</sub> measurements, we conducted a supplementary sensitivity analysis by imputing PM<sub>2.5</sub> from PM<sub>10</sub> concentrations via linear regression. This allowed us to augment the PM<sub>2.5</sub> network with four additional stations that did not originally measure PM<sub>2.5</sub>.

### 9.1 Interpolation method

As presented in the main text, starting monitoring stations sample for PM<sub>2.5</sub> only included 8 stations, compared to the 12 measuring PM<sub>10</sub>. Hence, Tiburtina, Fermi, Magna Grecia and Bufalotta stations concentrations were interpolated from PM<sub>10</sub> values in the same period. Figure 7 is a descriptive tool that gives us a general idea of the linear relationship between the two particulate matters.

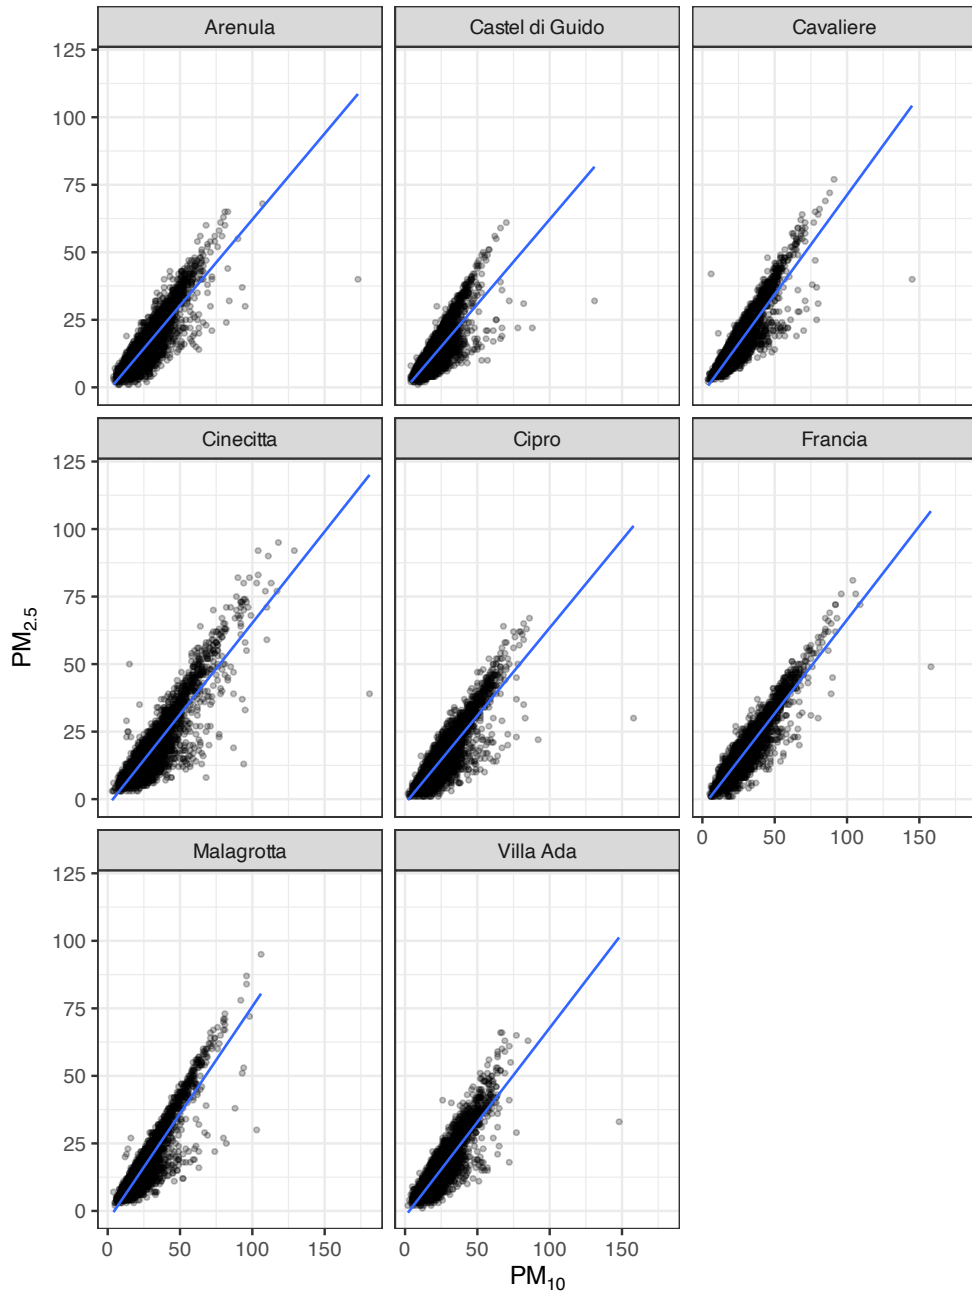

Fig. 7 Relationship between PM<sub>10</sub> and PM<sub>2.5</sub> in shared monitoring sites. Original values in  $\mu\text{g}/\text{m}^3$ .

Hence, we performed an extremely rapid model selection comparing Akaike Information Criterion (AIC), and adjusted  $R^2$ . The best resulting model specification was:

$$\text{PM}_{10} + \text{year} + \text{wday} + \sin\left(\frac{2\pi \text{doy}}{365}\right) + \cos\left(\frac{2\pi \text{doy}}{365}\right) + x_{\text{std}} + y_{\text{std}}$$

The sin and cos terms capture daily seasonality patterns (with  $\text{doy} \in \{1, \dots, 365\}$ ), while  $\text{wday} \in \{1, \dots, 7\}$  the effect of weekly fluctuations.  $x_{\text{std}}$  and  $y_{\text{std}}$  represent the effect of spatial coordinates expressed in WGS 84 / UTM zone 32N and then normalised by their in sample maxima. In-sample fit for the selected model showed good results (0.258 RMSE, 0.193 MAE, adjusted  $R^2 = 0.762$ ; computed on the  $\log(1+x)$  scale).

## 9.2 Comparison measured-only vs augmented

To provide an example, Figure 8 displays the comparison for 2011 surface from the measured-only network (8 sites, on the left) with the surface obtained under the augmented network (8+4 sites, on the right in the same chart). The augmented fit seems to bring modest changes in spatial contrast, most notably around the Cinecitta station's area, in the east side of the city centre: the map seems slightly more discriminant around that pollution spike, probably due to the contribution of the newly added Tiburtina station. Nevertheless, the overall surface remains smooth. Given that the additional locations are indirectly obtained, in all cases these results should be interpreted cautiously and are reported only to evaluate the impact of network sparsity on  $\text{PM}_{2.5}$  mapping.

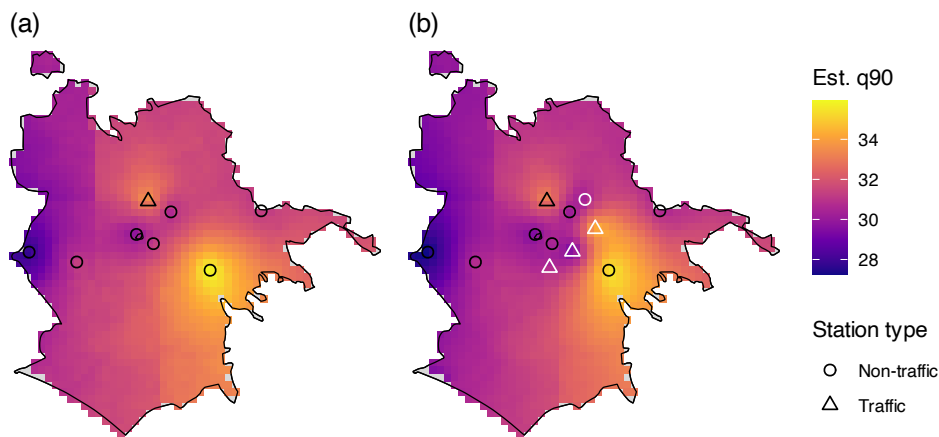

**Fig. 8** Estimated quantile surfaces for PM<sub>2.5</sub> at  $\tau = 0.90$ . Values in  $\mu\text{g}/\text{m}^3$ . Annual averages of 2011 computed using (a) the measured-only network (8 sites), and (b) augmented network (8+4 sites, the latter in white).

## References

- Plummer M, Best N, Cowles K, et al (2006) Coda: Convergence diagnosis and output analysis for mcmc. *R News* 6(1):7–11. URL <https://journal.r-project.org/archive/>
- Spiegelhalter DJ, Best NG, Carlin BP, et al (2002) Bayesian Measures of Model Complexity and Fit. *Journal of the Royal Statistical Society Series B: Statistical Methodology* 64(4):583–639. <https://doi.org/10.1111/1467-9868.00353>
- Stafoggia M, Bellander T, Bucci S, et al (2019) Estimation of daily PM<sub>10</sub> and PM<sub>2.5</sub> concentrations in Italy, 2013–2015, using a spatiotemporal land-use random-forest model. *Environment International* 124:170–179. <https://doi.org/10.1016/j.envint.2019.01.016>
- Stafoggia M, Johansson C, Glantz P, et al (2020) A Random Forest Approach to Estimate Daily Particulate Matter, Nitrogen Dioxide, and Ozone at Fine Spatial Resolution in Sweden. *Atmosphere* 11(3):239. <https://doi.org/10.3390/atmos11030239>
